# Supplementary material for: Measuring Investor Attention Using Google Search
Source: Atypon-hosted journal article supplement (doi:10.1287/mnsc.2022.02174), 2024-10-29
Supplement: mnsc.2022.02174.sm1.pdf [file mnsc.2022.02174.sm1.pdf]

**Supplementary Materials to:**  
**Measuring Investor Attention Using Google Search**

Ed deHaan  
Alastair Lawrence  
Robin Litjens

These Supplementary Materials contain additional discussion and analyses referenced in the main paper.

SM1: Ticker-Level Search Volume and the Fraction of Search Determined to be Investor-Related

SM2: Complete tabulation of Table 4

SM3: Additional specifications of Table 4

SM4: Simulation Results of Induced Increase in Ticker Search on Random Days

SM5: Complete tabulation of Table 7

SM6: Published studies using Google ticker SVI

## SM1: Ticker-Level Search Volume and the Fraction Determined to be Investor-Related

This table lists the average ticker searches (e.g., “AAPL”) per firm-month (in units of one) for each of the 490 tickers in our sample (*Keyword Search*) for our sample period (column (i)). Column (ii) lists the percentage of searches determined to be investor-related (*Investor Search*). “Investor-related” searches are determined based on the contents of the click-through website. Specifically, we designate a website as investor-related if it “likely provides current information for investors about the ticker being searched.” See Section 2 for further details. Column (iii) lists estimated ticker search (e.g., “AAPL”) that is presumed to be investor-related (i.e., (i)×(ii)). Column (iv) lists the average ticker-stock searches (e.g., “AAPL stock”) per firm month (in units of one) for each of the 490 tickers in our sample (*TS-Keyword Search*) for our sample period. Column (v) lists the percentage of searches determined to be investor-related (*TS-Investor Search*). Column (vi) lists estimated ticker-stock search (e.g., “AAPL stock”) that is presumed to be investor-related (i.e., (i)×(ii)). \*Indicates the ticker search results show a market summary box.

| Ticker | Name                              | Ticker Search                |                                |                                                     | Ticker Stock Search              |                                  |                                                    |
|--------|-----------------------------------|------------------------------|--------------------------------|-----------------------------------------------------|----------------------------------|----------------------------------|----------------------------------------------------|
|        |                                   | (i)<br><u>Keyword Search</u> | (ii)<br><u>Investor Search</u> | (iii)<br><u>Estimated Search</u><br><u>(i)×(ii)</u> | (iv)<br><u>TS-Keyword Search</u> | (v)<br><u>TS-Investor Search</u> | (vi)<br><u>Estimated Search</u><br><u>(iv)×(v)</u> |
| A      | Agilent Technologies Inc          | 1,519,412                    | 0.7%                           | 10,028                                              | 6,415                            | 75.4%                            | 4,834                                              |
| AA     | Alcoa Inc                         | 523,333                      | 1.5%                           | 7,955                                               | 58,700                           | 78.0%                            | 45,792                                             |
| AAL    | American Airlines Group           | 41,855*                      | 76.0%                          | 31,797                                              | 586,538                          | 85.3%                            | 500,317                                            |
| AAP    | Advance Auto Parts                | 48,755                       | 17.4%                          | 8,493                                               | 9,692                            | 73.6%                            | 7,137                                              |
| AAPL   | Apple Inc.                        | 1,141,600*                   | 70.8%                          | 808,481                                             | 1,953,846                        | 80.8%                            | 770,994                                            |
| ABBV   | AbbVie                            | 17,995*                      | 62.9%                          | 11,310                                              | 66,538                           | 86.8%                            | 57,775                                             |
| ABC    | AmerisourceBergen Corp            | 1,192,950                    | 0.1%                           | 716                                                 | 9,792                            | 41.0%                            | 4,012                                              |
| ABT    | Abbott Laboratories               | 85,850                       | 7.6%                           | 6,559                                               | 69,931                           | 87.0%                            | 60,812                                             |
| ACN    | Accenture plc                     | 33,610                       | 5.6%                           | 1,892                                               | 32,500                           | 77.5%                            | 25,188                                             |
| ADBE   | Adobe Systems Inc                 | 22,750*                      | 70.6%                          | 16,055                                              | 65,585                           | 79.4%                            | 52,042                                             |
| ADI    | Analog Devices Inc.               | 41,850                       | 1.3%                           | 527                                                 | 15,615                           | 73.3%                            | 11,454                                             |
| ADM    | Archer-Daniels-Midland Co         | 39,845                       | 5.0%                           | 1,980                                               | 22,700                           | 77.7%                            | 17,649                                             |
| ADP    | Automatic Data Processing         | 1,396,000                    | 0.3%                           | 4,048                                               | 24,292                           | 91.9%                            | 22,322                                             |
| ADS    | Alliance Data Systems             | 192,000                      | 2.7%                           | 5,088                                               | 12,854                           | 83.0%                            | 10,669                                             |
| ADSK   | Autodesk Inc                      | 121,525*                     | 84.5%                          | 102,701                                             | 17,323                           | 87.9%                            | 15,227                                             |
| AEE    | Ameren Corp                       | 18,020*                      | 3.3%                           | 586                                                 | 4,800                            | 84.4%                            | 4,051                                              |
| AEP    | American Electric Power           | 138,750*                     | 0.8%                           | 1,096                                               | 21,077                           | 85.1%                            | 17,928                                             |
| AES    | AES Corp                          | 165,450                      | 1.0%                           | 1,671                                               | 11,862                           | 0.0%                             | 0                                                  |
| AET    | Aetna Inc                         | 27,375                       | 6.8%                           | 1,853                                               | 566                              | 92.3%                            | 523                                                |
| AFL    | AFLAC Inc                         | 38,440                       | 0.8%                           | 296                                                 | 26,100                           | 68.5%                            | 17,879                                             |
| AGN    | Allergan plc                      | 23,320*                      | 53.5%                          | 12,465                                              | 1,252                            | 94.3%                            | 1,181                                              |
| AIG    | American International Group Inc. | 71,600                       | 24.9%                          | 17,800                                              | 28,531                           | 65.1%                            | 18,577                                             |
| AIV    | Apartment Investment & Mgmt       | 1,656*                       | 10.6%                          | 175                                                 | 18,608                           | 86.0%                            | 16,007                                             |
| AIZ    | Assurant Inc                      | 1,859*                       | 30.0%                          | 557                                                 | 1,746                            | 69.4%                            | 1,212                                              |
| AJG    | Arthur J. Gallagher & Co.         | 1,789*                       | 3.9%                           | 70                                                  | 3,338                            | 78.1%                            | 2,605                                              |
| AKAM   | Akamai Technologies Inc           | 13,230*                      | 56.2%                          | 7,430                                               | 15,800                           | 86.8%                            | 13,711                                             |
| ALB    | Albemarle Corp                    | 247,000*                     | 60.1%                          | 148,447                                             | 32,262                           | 89.7%                            | 28,955                                             |
| ALK    | Alaska Air Group Inc              | 11,575*                      | 48.9%                          | 5,665                                               | 44,992                           | 69.0%                            | 31,031                                             |
| ALL    | Allstate Corp                     | 152,625                      | 2.1%                           | 3,175                                               | 10,208                           | 20.5%                            | 2,097                                              |
| ALLE   | Allegion                          | 5,824*                       | 30.2%                          | 1,759                                               | 883                              | 78.0%                            | 689                                                |
| ALXN   | Alexion Pharmaceuticals           | 20,240*                      | 69.5%                          | 14,067                                              | 8,600                            | 90.8%                            | 7,808                                              |
| AMAT   | Applied Materials Inc             | 20,305*                      | 74.1%                          | 15,050                                              | 89,808                           | 78.9%                            | 70,867                                             |
| AME    | Ametek                            | 25,630*                      | 1.8%                           | 454                                                 | 7,954                            | 81.8%                            | 6,506                                              |
| AMG    | Affiliated Managers Group Inc     | 31,370                       | 0.3%                           | 82                                                  | 2,769                            | 79.7%                            | 2,207                                              |
| AMGN   | Amgen Inc                         | 25,455*                      | 81.6%                          | 20,761                                              | 17,508                           | 85.3%                            | 14,936                                             |
| AMP    | Ameriprise Financial              | 76,300                       | 0.6%                           | 427                                                 | 5,192                            | 74.2%                            | 3,852                                              |
| AMT    | American Tower Corp A             | 39,160                       | 25.9%                          | 10,142                                              | 32,062                           | 78.1%                            | 25,031                                             |
| AMZN   | Amazon.com Inc                    | 611,450*                     | 66.9%                          | 409,243                                             | 1,095,846                        | 73.5%                            | 240,198                                            |
| AN     | AutoNation Inc                    | 143,571                      | 0.6%                           | 818                                                 | 5,115                            | 93.2%                            | 4,769                                              |
| ANTM   | Anthem Inc.                       | 26,945                       | 1.6%                           | 437                                                 | 11,723                           | 73.2%                            | 8,585                                              |
| AON    | Aon plc                           | 29,695                       | 5.3%                           | 1,562                                               | 12,577                           | 82.9%                            | 10,423                                             |

| Ticker | Name                             | Ticker Search         |                        |                                  | Ticker Stock Search |                           |                                  |
|--------|----------------------------------|-----------------------|------------------------|----------------------------------|---------------------|---------------------------|----------------------------------|
|        |                                  | (i)                   | (ii)                   | (iii)                            | (iv)                | (v)                       | (vi)                             |
|        |                                  | <u>Keyword Search</u> | <u>Investor Search</u> | <u>Estimated Search (i)×(ii)</u> | <u>TS-Search</u>    | <u>TS-Investor Search</u> | <u>Estimated Search (iv)×(v)</u> |
| APA    | Apache Corporation               | 147,450               | 0.2%                   | 236                              | 51,054              | 69.8%                     | 35,641                           |
| APC    | Anadarko Petroleum Corp          | 75,800                | 0.3%                   | 197                              | 467                 | 84.1%                     | 393                              |
| APD    | Air Products & Chemicals Inc     | 53,450                | 3.2%                   | 1,726                            | 12,846              | 48.8%                     | 6,273                            |
| APH    | Amphenol Corp A                  | 5,590*                | 6.8%                   | 382                              | 4,138               | 70.2%                     | 2,905                            |
| ATVI   | Activision Blizzard              | 39,565*               | 79.3%                  | 31,387                           | 56,208              | 85.4%                     | 48,018                           |
| AVB    | AvalonBay Communities Inc.       | 6,217*                | 22.0%                  | 1,366                            | 6,508               | 85.8%                     | 5,586                            |
| AVGO   | Avago Technologies               | 23,065*               | 28.0%                  | 6,447                            | 52,615              | 85.2%                     | 44,833                           |
| AVY    | Avery Dennison Corp              | 1,720*                | 66.1%                  | 1,137                            | 1,885               | 90.9%                     | 1,713                            |
| AWK    | American Water Works Company Inc | 16,685                | 1.2%                   | 207                              | 14,585              | 85.6%                     | 12,482                           |
| AXP    | American Express Co              | 12,960*               | 80.0%                  | 10,367                           | 31,808              | 89.5%                     | 28,462                           |
| AYI    | Acuity Brands Inc                | 12,686*               | 7.4%                   | 932                              | 2,538               | 96.3%                     | 2,444                            |
| AZO    | AutoZone Inc                     | 66,235                | 7.3%                   | 4,815                            | 12,215              | 73.0%                     | 8,912                            |
| BA     | Boeing Company                   | 181,941*              | 21.6%                  | 39,226                           | 873,462             | 78.5%                     | 685,318                          |
| BAC    | Bank of America Corp             | 316,300*              | 59.8%                  | 189,116                          | 379,154             | 91.1%                     | 345,258                          |
| BAX    | Baxter International Inc.        | 5,953*                | 54.3%                  | 3,230                            | 5,469               | 83.4%                     | 4,561                            |
| BBBY   | Bed Bath & Beyond                | 8,818*                | 74.1%                  | 6,530                            | 135,892             | 90.5%                     | 122,928                          |
| BBT    | BB&T Corporation                 | 2,035,000*            | 0.2%                   | 3,663                            | 11,908              | 14.1%                     | 1,677                            |
| BBY    | Best Buy Co. Inc.                | 26,015*               | 53.4%                  | 13,884                           | 48,823              | 88.9%                     | 43,399                           |
| BCR    | Bard (C.R.) Inc.                 | 11,506                | 6.7%                   | 770                              | 82                  | 100.0%                    | 82                               |
| BDX    | Becton Dickinson                 | 8,415*                | 49.2%                  | 4,143                            | 11,477              | 75.7%                     | 8,692                            |
| BEN    | Franklin Resources               | 56,100                | 4.5%                   | 2,530                            | 6,831               | 70.4%                     | 4,812                            |
| BFA    | Brown-Forman Corporation         | 14,425                | 0.1%                   | 10                               | 215                 | 34.0%                     | 73                               |
| BFB    | Brown-Forman Corporation         | 2,650                 | 90.3%                  | 2,394                            | 2,969               | 43.2%                     | 1,283                            |
| BIIB   | BIOGEN IDEC Inc.                 | 28,805*               | 92.2%                  | 26,564                           | 44,585              | 88.5%                     | 39,471                           |
| BK     | The Bank of New York Mellon      | 50,794                | 3.5%                   | 1,757                            | 14,777              | 83.0%                     | 12,263                           |
| BLK    | BlackRock                        | 10,694*               | 19.7%                  | 2,109                            | 23,346              | 72.7%                     | 16,970                           |
| BLL    | Ball Corp                        | 11,900*               | 63.6%                  | 7,571                            | 7,685               | 96.3%                     | 7,402                            |
| BMJ    | Bristol-Myers Squibb             | 41,205*               | 48.5%                  | 19,980                           | 75,808              | 87.9%                     | 66,658                           |
| BRKA   | Berkshire Hathaway               | 9,550*                | 80.4%                  | 7,676                            | 7,162               | 87.5%                     | 6,268                            |
| BRKB   | Berkshire Hathaway               | 71,785*               | 73.4%                  | 52,705                           | 113,115             | 84.1%                     | 95,107                           |
| BSX    | Boston Scientific                | 8,030*                | 85.4%                  | 6,854                            | 18,215              | 82.0%                     | 14,945                           |
| BWA    | BorgWarner                       | 8,770*                | 1.3%                   | 111                              | 6,815               | 82.0%                     | 5,588                            |
| BXP    | Boston Properties                | 938*                  | 28.0%                  | 263                              | 7,331               | 72.1%                     | 5,289                            |
| C      | Citigroup Inc.                   | 1,220,000             | 8.8%                   | 106,750                          | 146,923             | 90.5%                     | 133,024                          |
| CA     | CA Inc.                          | 275,118               | 0.3%                   | 853                              | 1,312               | 95.8%                     | 1,257                            |
| CAG    | ConAgra Foods Inc.               | 18,545*               | 2.6%                   | 486                              | 8,531               | 91.4%                     | 7,796                            |
| CAH    | Cardinal Health Inc.             | 17,890                | 28.6%                  | 5,115                            | 12,831              | 79.9%                     | 10,255                           |
| CAT    | Caterpillar Inc.                 | 1,179,000             | 6.1%                   | 71,447                           | 130,423             | 82.6%                     | 107,716                          |
| CB     | Chubb Limited                    | 1,045,588*            | 3.1%                   | 32,518                           | 10,500              | 78.3%                     | 8,223                            |
| CBG    | CBRE Group                       | 9,000                 | 2.3%                   | 209                              | 233                 | 66.7%                     | 155                              |
| CBS    | CBS Corp.                        | 1,029,200             | 0.1%                   | 823                              | 10,500              | 63.2%                     | 6,631                            |
| CBSA   | CBS Corp.                        | 7,935                 | 0.0%                   | 0                                | 20                  | 63.2%                     | 13                               |
| CCI    | Crown Castle International Corp. | 35,080                | 5.1%                   | 1,775                            | 32,108              | 60.0%                     | 19,252                           |
| CCL    | Carnival Corp.                   | 18,015*               | 13.5%                  | 2,437                            | 773,615             | 87.8%                     | 19,746                           |
| CELG   | Celgene Corp.                    | 38,310*               | 39.7%                  | 15,224                           | 693                 | 93.5%                     | 648                              |
| CERN   | Cerner                           | 77,725                | 7.1%                   | 5,526                            | 9,431               | 69.5%                     | 6,551                            |
| CF     | CF Industries Holdings Inc       | 59,353                | 7.3%                   | 4,345                            | 6,662               | 80.5%                     | 5,364                            |
| CFG    | Citizens Financial Group         | 9,595*                | 34.9%                  | 3,350                            | 10,023              | 80.3%                     | 8,049                            |
| CHD    | Church & Dwight                  | 22,455                | 6.4%                   | 1,428                            | 6,338               | 65.2%                     | 4,133                            |
| CHK    | Chesapeake Energy                | 134,250*              | 70.8%                  | 95,009                           | 28,831              | 71.7%                     | 20,669                           |
| CHRW   | C. H. Robinson Worldwide         | 5,284*                | 58.5%                  | 3,092                            | 5,185               | 76.4%                     | 3,963                            |
| CI     | CIGNA Corp.                      | 60,500*               | 3.1%                   | 1,894                            | 14,585              | 72.8%                     | 10,616                           |
| CINF   | Cincinnati Financial             | 2,023*                | 80.1%                  | 1,620                            | 6,669               | 87.5%                     | 5,837                            |
| CL     | Colgate-Palmolive                | 181,941               | 7.5%                   | 13,646                           | 11,754              | 76.4%                     | 8,979                            |
| CLX    | The Clorox Company               | 4,338*                | 63.1%                  | 2,737                            | 27,362              | 88.6%                     | 24,251                           |
| CMA    | Comerica Inc.                    | 58,130                | 4.7%                   | 2,720                            | 5,723               | 88.0%                     | 5,033                            |
| CMCSA  | Comcast A Corp                   | 28,220*               | 51.4%                  | 14,508                           | 12,762              | 93.6%                     | 11,948                           |

|               |                                | Ticker Search  |                 |                  | Ticker Stock Search |               |                  |
|---------------|--------------------------------|----------------|-----------------|------------------|---------------------|---------------|------------------|
|               |                                | (i)            | (ii)            | (iii)            | (iv)                | (v)           | (vi)             |
|               |                                | <u>Keyword</u> | <u>Investor</u> | <u>Estimated</u> | <u>TS-</u>          | <u>TS-</u>    | <u>Estimated</u> |
| <u>Ticker</u> | <u>Name</u>                    | <u>Search</u>  | <u>Search</u>   | <u>(i)×(ii)</u>  | <u>Search</u>       | <u>Search</u> | <u>(iv)×(v)</u>  |
| CME           | CME Group Inc.                 | 52,975         | 76.2%           | 40,378           | 16,454              | 85.9%         | 14,129           |
| CMG           | Chipotle Mexican Grill         | 98,075         | 80.5%           | 78,911           | 51,508              | 84.2%         | 43,390           |
| CMI           | Cummins Inc.                   | 23,465*        | 14.0%           | 3,287            | 18,031              | 95.8%         | 17,276           |
| CMS           | CMS Energy                     | 202,200        | 0.1%            | 121              | 3,669               | 94.9%         | 3,481            |
| CNC           | Centene Corporation            | 37,910         | 7.4%            | 2,817            | 12,092              | 84.3%         | 10,189           |
| CNP           | CenterPoint Energy             | 7,890*         | 24.2%           | 1,905            | 8,338               | 93.7%         | 7,817            |
| COF           | Capital One Financial          | 27,990*        | 53.3%           | 14,905           | 29,600              | 83.5%         | 24,704           |
| COG           | Cabot Oil & Gas                | 39,550         | 9.2%            | 3,623            | 7,392               | 63.7%         | 4,710            |
| COL           | Rockwell Collins               | 50,450*        | 11.4%           | 5,736            | 208                 | 97.5%         | 203              |
| COP           | ConocoPhillips                 | 99,350*        | 31.9%           | 31,693           | 58,538              | 87.8%         | 51,385           |
| COST          | Costco Co.                     | 62,382*        | 40.1%           | 25,021           | 75,231              | 79.7%         | 59,997           |
| CPB           | Campbell Soup                  | 23,765         | 4.6%            | 1,100            | 11,577              | 88.8%         | 10,280           |
| CRM           | Salesforce.com                 | 142,750        | 8.2%            | 11,648           | 342,462             | 85.1%         | 291,435          |
| CSCO          | Cisco Systems                  | 81,975*        | 47.3%           | 38,766           | 94,846              | 86.3%         | 81,871           |
| CSRA          | CSRA Inc.                      | 22,155         | 1.8%            | 401              | 1,091               | 100.0%        | 1,091            |
| CSX           | CSX Corp.                      | 56,150         | 26.6%           | 14,913           | 74,115              | 59.6%         | 44,173           |
| CTAS          | Cintas Corporation             | 92,750*        | 27.0%           | 25,043           | 6,354               | 74.2%         | 4,715            |
| CTL           | CenturyLink Inc                | 19,347*        | 52.9%           | 10,236           | 11,168              | 86.7%         | 9,678            |
| CTSH          | Cognizant Technology Solutions | 67,075*        | 66.7%           | 44,719           | 10,077              | 46.8%         | 4,713            |
| CTXS          | Citrix Systems                 | 6,055*         | 84.5%           | 5,115            | 5,254               | 61.0%         | 3,205            |
| CVS           | CVS Health                     | 3,424,000*     | 0.4%            | 11,984           | 247,385             | 86.0%         | 212,751          |
| CVX           | Chevron Corp.                  | 60,800*        | 43.0%           | 26,132           | 124,231             | 88.3%         | 109,696          |
| CXO           | Concho Resources               | 5,160*         | 6.8%            | 351              | 3,556               | 94.0%         | 3,342            |
| D             | Dominion Resources             | 823,000        | 6.2%            | 51,273           | 24,292              | 61.9%         | 15,037           |
| DAL           | Delta Air Lines                | 39,180         | 30.3%           | 11,887           | 314,231             | 82.0%         | 257,764          |
| DE            | Deere & Co.                    | 165,000*       | 33.7%           | 55,589           | 37,908              | 77.9%         | 29,542           |
| DFS           | Discover Financial Services    | 31,670         | 3.8%            | 1,194            | 34,585              | 53.3%         | 18,417           |
| DG            | Dollar General                 | 35,276         | 22.1%           | 7,796            | 35,538              | 85.3%         | 30,296           |
| DGX           | Quest Diagnostics              | 5,089*         | 33.4%           | 1,700            | 11,262              | 89.3%         | 10,057           |
| DHI           | D. R. Horton                   | 4,929*         | 14.6%           | 721              | 18,854              | 78.4%         | 14,772           |
| DHR           | Danaher Corp.                  | 17,935*        | 21.8%           | 3,903            | 17,992              | 83.6%         | 15,045           |
| DIS           | The Walt Disney Company        | 136,805*       | 64.5%           | 88,294           | 339,308             | 77.3%         | 262,387          |
| DISCA         | Discovery Communications-A     | 1,906*         | 77.2%           | 1,471            | 27,177              | 89.8%         | 24,416           |
| DISCK         | Discovery Communications-C     | 1,212*         | 97.4%           | 1,180            | 4,051               | 94.6%         | 3,832            |
| DLR           | Digital Realty Trust           | 5,580*         | 25.7%           | 1,435            | 11,285              | 79.1%         | 8,924            |
| DLTR          | Dollar Tree                    | 5,550*         | 41.6%           | 2,307            | 12,608              | 100.0%        | 12,608           |
| DNB           | Dun & Bradstreet               | 14,529         | 2.3%            | 340              | 3,446               | 80.5%         | 2,775            |
| DO            | Diamond Offshore Drilling      | 208,941        | 0.7%            | 1,358            | 692                 | 82.0%         | 567              |
| DOV           | Dover Corp.                    | 5,300*         | 82.8%           | 4,389            | 2,200               | 88.2%         | 1,940            |
| DPS           | Dr. Pepper Snapple Group       | 131,500        | 0.2%            | 237              | 366                 | 91.8%         | 336              |
| DRI           | Darden Restaurants             | 42,700         | 9.3%            | 3,958            | 24,185              | 79.5%         | 19,222           |
| DTE           | DTE Energy Co.                 | 126,500        | 18.2%           | 23,048           | 17,400              | 81.4%         | 14,157           |
| DUK           | Duke Energy                    | 15,455*        | 59.7%           | 9,220            | 28,192              | 70.9%         | 19,982           |
| DVA           | DaVita Inc.                    | 44,830*        | 5.2%            | 2,318            | 6,485               | 89.2%         | 5,787            |
| DVN           | Devon Energy Corp.             | 10,647*        | 46.7%           | 4,976            | 39,731              | 89.6%         | 35,591           |
| EA            | Electronic Arts                | 187,235        | 16.9%           | 31,718           | 39,608              | 86.2%         | 34,126           |
| EBAY          | eBay Inc.                      | 44,300,000     | 0.0%            | 0                | 92,731              | 71.9%         | 66,646           |
| ECL           | Ecolab Inc.                    | 7,100*         | 40.0%           | 2,836            | 6,031               | 67.5%         | 4,070            |
| ED            | Consolidated Edison            | 245,118        | 3.6%            | 8,898            | 23,008              | 91.8%         | 21,114           |
| EFX           | Equifax Inc.                   | 11,535*        | 53.7%           | 6,193            | 3,131               | 77.8%         | 2,436            |
| EIX           | Edison Int'l                   | 4,508*         | 67.6%           | 3,046            | 9,223               | 57.1%         | 5,267            |
| EL            | Estee Lauder Cos.              | 90,676         | 5.8%            | 5,232            | 10,338              | 85.2%         | 8,806            |
| EMN           | Eastman Chemical               | 5,706*         | 82.3%           | 4,693            | 4,831               | 94.1%         | 4,548            |
| EMR           | Emerson Electric Company       | 35,390         | 13.6%           | 4,817            | 11,908              | 88.2%         | 10,499           |
| ENDP          | Endo International             | 64,588*        | 59.2%           | 38,243           | 14,062              | 56.3%         | 7,917            |
| EOG           | EOG Resources                  | 8,665*         | 24.6%           | 2,129            | 27,923              | 68.6%         | 19,155           |
| EQIX          | Equinix                        | 12,937*        | 17.7%           | 2,285            | 15,277              | 88.0%         | 13,442           |

|               |                                        | Ticker Search  |                 |                  | Ticker Stock Search |                 |                  |
|---------------|----------------------------------------|----------------|-----------------|------------------|---------------------|-----------------|------------------|
|               |                                        | (i)            | (ii)            | (iii)            | (iv)                | (v)             | (vi)             |
|               |                                        | <u>Keyword</u> | <u>Investor</u> | <u>Estimated</u> | <u>TS-</u>          | <u>TS-</u>      | <u>Estimated</u> |
| <u>Ticker</u> | <u>Name</u>                            | <u>Search</u>  | <u>Search</u>   | <u>(i)×(ii)</u>  | <u>keyword</u>      | <u>Investor</u> | <u>Search</u>    |
|               |                                        |                |                 |                  | <u>Search</u>       | <u>Search</u>   | <u>(iv)×(v)</u>  |
| EQR           | Equity Residential                     | 2,035*         | 17.0%           | 346              | 8,508               | 90.6%           | 7,709            |
| EQT           | EQT Corporation                        | 17,915*        | 14.0%           | 2,499            | 15,085              | 82.1%           | 12,391           |
| ES            | Eversource Energy                      | 348,294*       | 0.3%            | 1,045            | 7,200               | 96.9%           | 6,976            |
| ESRX          | Express Scripts                        | 11,330*        | 83.4%           | 9,454            | 278                 | 90.8%           | 253              |
| ESS           | Essex Property Trust Inc               | 70,625         | 2.2%            | 1,547            | 5,969               | 94.5%           | 5,638            |
| ETFC          | E*Trade                                | 6,118*         | 96.7%           | 5,913            | 998                 | 81.8%           | 816              |
| ETN           | Eaton Corporation                      | 18,340         | 16.0%           | 2,938            | 15,262              | 94.7%           | 14,459           |
| ETR           | Entergy Corp.                          | 10,230*        | 14.5%           | 1,485            | 4,815               | 100.0%          | 4,815            |
| EW            | Edwards Lifesciences Corp.             | 170,631        | 0.9%            | 1,467            | 14,938              | 83.0%           | 12,403           |
| EXC           | Exelon Corp.                           | 18,235*        | 67.7%           | 12,351           | 9,485               | 55.4%           | 5,258            |
| EXPD          | Expeditors Int'l                       | 4,329*         | 28.5%           | 1,233            | 3,769               | 70.8%           | 2,668            |
| EXPE          | Expedia Inc.                           | 15,035*        | 51.5%           | 7,746            | 28,431              | 73.2%           | 20,811           |
| EXR           | Extra Space Storage                    | 3,494*         | 29.9%           | 1,044            | 3,623               | 88.4%           | 3,201            |
| F             | Ford Motor                             | 3,999,412*     | 1.1%            | 45,193           | 475,923             | 72.3%           | 344,283          |
| FAST          | Fastenal Co                            | 91,775         | 1.4%            | 1,285            | 10,823              | 81.5%           | 8,821            |
| FB            | Facebook                               | 5,671,176      | 1.6%            | 90,739           | 949,308             | 80.8%           | 767,231          |
| FBHS          | Fortune Brands Home & Security         | 1,456*         | 5.5%            | 80               | 1,815               | 91.0%           | 1,652            |
| FCX           | Freeport-McMoran Cp & Gld              | 57,220*        | 60.2%           | 34,418           | 96,423              | 86.4%           | 83,348           |
| FDX           | FedEx Corporation                      | 13,650*        | 81.3%           | 11,093           | 92,731              | 12.1%           | 11,183           |
| FE            | FirstEnergy Corp                       | 78,853         | 1.6%            | 1,238            | 25,108              | 58.4%           | 14,661           |
| FFIV          | F5 Networks                            | 9,795*         | 65.0%           | 6,363            | 5,331               | 31.8%           | 1,694            |
| FIS           | Fidelity National Information Services | 29,500         | 2.7%            | 794              | 13,138              | 88.0%           | 11,557           |
| FISV          | Fiserv Inc                             | 34,200*        | 69.9%           | 23,916           | 13,808              | 70.2%           | 9,697            |
| FITB          | Fifth Third Bancorp                    | 8,339*         | 19.8%           | 1,652            | 9,215               | 84.3%           | 7,766            |
| FL            | Foot Locker Inc                        | 89,265         | 25.6%           | 22,807           | 10,508              | 80.4%           | 8,447            |
| FLIR          | FLIR Systems                           | 37,990         | 0.6%            | 228              | 13,677              | 79.8%           | 10,913           |
| FLR           | Fluor Corp.                            | 8,385*         | 12.6%           | 1,059            | 22,300              | 92.4%           | 20,607           |
| FLS           | Flowserve Corporation                  | 5,178*         | 3.2%            | 163              | 2,262               | 85.0%           | 1,922            |
| FMC           | FMC Corporation                        | 22,115         | 9.4%            | 2,077            | 6,300               | 92.4%           | 5,818            |
| FOX           | Twenty-First Century Fox Class B       | 1,471,250      | 0.4%            | 6,179            | 6,338               | 84.9%           | 5,382            |
| FOXA          | Twenty-First Century Fox Class A       | 3,288*         | 88.3%           | 2,904            | 6,723               | 78.2%           | 5,255            |
| FRT           | Federal Realty Investment Trust        | 3,950*         | 47.1%           | 1,858            | 10,285              | 90.3%           | 9,286            |
| FSLR          | First Solar Inc                        | 37,610*        | 69.0%           | 25,962           | 29,231              | 91.4%           | 26,723           |
| FTI           | FMC Technologies Inc.                  | 4,900          | 1.8%            | 89               | 15,415              | 90.6%           | 13,966           |
| FTR           | Frontier Communications                | 33,465*        | 38.8%           | 12,998           | 5,031               | 81.8%           | 4,117            |
| FTV           | Fortive Corp                           | 52,250         | 1.6%            | 826              | 2,462               | 54.9%           | 1,350            |
| GD            | General Dynamics                       | 37,453*        | 38.1%           | 14,258           | 46,192              | 84.0%           | 38,787           |
| GE            | General Electric                       | 170,143        | 32.6%           | 55,467           | 972,923             | 86.7%           | 318,831          |
| GGP           | General Growth Properties Inc.         | 6,080*         | 10.1%           | 617              | 387                 | 100.0%          | 387              |
| GILD          | Gilead Sciences                        | 91,700*        | 61.3%           | 56,166           | 104,577             | 85.6%           | 89,539           |
| GIS           | General Mills                          | 68,600         | 2.7%            | 1,873            | 24,208              | 80.0%           | 19,362           |
| GLW           | Corning Inc.                           | 14,585*        | 65.0%           | 9,473            | 26,054              | 91.6%           | 23,873           |
| GM            | General Motors                         | 1,486,471*     | 2.5%            | 37,608           | 459,769             | 81.6%           | 375,080          |
| GOOG          | Alphabet Inc Class C                   | 1,026,300*     | 27.7%           | 283,977          | 210,769             | 83.5%           | 175,950          |
| GOOGL         | Alphabet Inc Class A                   | 547,300*       | 19.5%           | 106,778          | 103,115             | 84.8%           | 87,462           |
| GPC           | Genuine Parts                          | 14,195         | 10.6%           | 1,505            | 7,569               | 83.7%           | 6,334            |
| GPN           | Global Payments Inc                    | 3,220*         | 23.1%           | 743              | 14,938              | 92.8%           | 13,864           |
| GPS           | Gap (The)                              | 437,800        | 1.1%            | 4,641            | 53,715              | 77.7%           | 41,747           |
| GRMN          | Garmin Ltd.                            | 9,340*         | 52.3%           | 4,886            | 4,769               | 87.7%           | 4,183            |
| GS            | Goldman Sachs Group                    | 118,824*       | 52.5%           | 62,347           | 80,462              | 84.5%           | 67,974           |
| GT            | Goodyear Tire & Rubber                 | 75,588         | 5.9%            | 4,422            | 31,454              | 76.7%           | 24,125           |
| GWW           | Grainger (W.W.) Inc.                   | 4,350*         | 10.7%           | 464              | 3,054               | 74.3%           | 2,270            |
| HAL           | Halliburton Co.                        | 29,680*        | 31.0%           | 9,207            | 1,953,846           | 83.4%           | 1,630,289        |
| HAS           | Hasbro Inc.                            | 53,200         | 20.1%           | 10,688           | 6,300               | 97.1%           | 6,116            |
| HBAN          | Huntington Bancshares                  | 10,806*        | 47.5%           | 5,132            | 16,938              | 88.2%           | 14,946           |
| HBI           | Hanesbrands Inc                        | 10,165*        | 46.2%           | 4,693            | 15,646              | 85.4%           | 13,365           |
| HCA           | HCA Holdings                           | 40,660         | 3.7%            | 1,517            | 26,892              | 68.9%           | 18,523           |

| Ticker | Name                                | Ticker Search         |                        |                                  | Ticker Stock Search |                           |                           |
|--------|-------------------------------------|-----------------------|------------------------|----------------------------------|---------------------|---------------------------|---------------------------|
|        |                                     | (i)                   | (ii)                   | (iii)                            | (iv)                | (v)                       | (vi)                      |
|        |                                     | <u>Keyword Search</u> | <u>Investor Search</u> | <u>Estimated Search (i)×(ii)</u> | <u>TS-Search</u>    | <u>TS-Investor Search</u> | <u>Estimated (iv)×(v)</u> |
| HCN    | Welltower Inc.                      | 22,476                | 23.4%                  | 5,259                            | 145                 | 94.5%                     | 137                       |
| HCP    | HCP Inc.                            | 13,045*               | 47.3%                  | 6,174                            | 1,173               | 88.4%                     | 1,037                     |
| HD     | Home Depot                          | 101,971*              | 30.3%                  | 30,938                           | 173,077             | 93.8%                     | 162,364                   |
| HES    | Hess Corporation                    | 14,275*               | 8.7%                   | 1,239                            | 9,238               | 100.0%                    | 9,238                     |
| HIG    | Hartford Financial Svc.Gp.          | 10,340*               | 13.0%                  | 1,344                            | 7,646               | 91.8%                     | 7,022                     |
| HOG    | Harley-Davidson                     | 39,470*               | 7.5%                   | 2,952                            | 21,077              | 93.1%                     | 19,623                    |
| HOLX   | Hologic                             | 3,072*                | 75.1%                  | 2,307                            | 7,685               | 87.7%                     | 6,737                     |
| HON    | Honeywell Int'l Inc.                | 33,060*               | 12.9%                  | 4,268                            | 35,377              | 92.0%                     | 32,536                    |
| HP     | Helmerich & Payne                   | 363,647               | 0.5%                   | 1,855                            | 19,185              | 83.0%                     | 15,927                    |
| HPE    | Hewlett Packard Enterprise          | 32,465                | 30.5%                  | 9,895                            | 29,585              | 70.9%                     | 20,979                    |
| HPQ    | HP Inc.                             | 16,455*               | 70.5%                  | 11,606                           | 39,362              | 90.5%                     | 35,623                    |
| HRB    | Block H&R                           | 4,915*                | 52.7%                  | 2,591                            | 12,485              | 89.8%                     | 11,215                    |
| HRL    | Hormel Foods Corp.                  | 4,700*                | 17.4%                  | 816                              | 11,646              | 68.8%                     | 8,016                     |
| HRS    | Harris Corporation                  | 10,270                | 4.4%                   | 448                              | 1,189               | 63.7%                     | 757                       |
| HSIC   | Henry Schein                        | 2,446*                | 81.7%                  | 1,999                            | 1,720               | 82.4%                     | 1,417                     |
| HST    | Host Hotels & Resorts               | 9,650*                | 4.9%                   | 473                              | 4,200               | 94.3%                     | 3,960                     |
| HSY    | The Hershey Company                 | 4,430*                | 58.3%                  | 2,581                            | 19,738              | 63.6%                     | 12,547                    |
| HUM    | Humana Inc.                         | 84,150                | 1.5%                   | 1,287                            | 7,308               | 92.3%                     | 6,749                     |
| IBM    | International Bus. Machines         | 169,200               | 21.4%                  | 36,192                           | 311,000             | 88.2%                     | 274,364                   |
| ICE    | Intercontinental Exchange           | 213,450               | 3.1%                   | 6,574                            | 14,692              | 0.0%                      | 0                         |
| IFF    | Intl Flavors & Fragrances           | 10,030                | 0.8%                   | 77                               | 6,069               | 71.4%                     | 4,335                     |
| ILMN   | Illumina Inc                        | 60,925*               | 77.3%                  | 47,113                           | 26,285              | 89.1%                     | 23,417                    |
| INTC   | Intel Corp.                         | 109,900*              | 63.6%                  | 69,863                           | 218,462             | 43.7%                     | 95,490                    |
| INTU   | Intuit Inc.                         | 6,826*                | 53.7%                  | 3,662                            | 11,508              | 85.8%                     | 9,869                     |
| IP     | International Paper                 | 332,529               | 0.1%                   | 266                              | 15,785              | 97.4%                     | 15,370                    |
| IPG    | Interpublic Group                   | 12,015                | 1.8%                   | 214                              | 4,769               | 60.1%                     | 2,865                     |
| IR     | Ingersoll-Rand PLC                  | 49,682*               | 3.2%                   | 1,585                            | 3,254               | 98.5%                     | 3,206                     |
| IRM    | Iron Mountain Incorporated          | 9,905*                | 13.5%                  | 1,340                            | 34,877              | 92.6%                     | 32,310                    |
| ISRG   | Intuitive Surgical Inc.             | 18,410                | 77.0%                  | 14,168                           | 34,792              | 91.5%                     | 31,845                    |
| ITW    | Illinois Tool Works                 | 13,920                | 4.7%                   | 649                              | 14,262              | 84.8%                     | 12,098                    |
| IVZ    | Invesco Ltd.                        | 1,395*                | 41.9%                  | 585                              | 11,346              | 85.9%                     | 9,747                     |
| JBHT   | J. B. Hunt Transport Services       | 1,671*                | 100.0%                 | 1,671                            | 2,477               | 97.7%                     | 2,420                     |
| JCI    | Johnson Controls                    | 12,775                | 16.5%                  | 2,104                            | 10,185              | 70.9%                     | 7,221                     |
| JEC    | Jacobs Engineering Group            | 4,119*                | 26.7%                  | 1,101                            | 365                 | 99.9%                     | 365                       |
| JNJ    | Johnson & Johnson                   | 32,235                | 70.8%                  | 22,835                           | 274,154             | 68.7%                     | 188,371                   |
| JNPR   | Juniper Networks                    | 8,763*                | 65.5%                  | 5,741                            | 4,769               | 100.0%                    | 4,769                     |
| JPM    | JPMorgan Chase & Co.                | 124,700*              | 56.3%                  | 70,206                           | 272,154             | 0.0%                      | 0                         |
| JWN    | Nordstrom                           | 11,295*               | 76.6%                  | 8,654                            | 53,762              | 83.6%                     | 44,934                    |
| K      | Kellogg Co.                         | 805,353               | 0.1%                   | 564                              | 14,492              | 92.4%                     | 13,391                    |
| KEY    | KeyCorp                             | 131,500*              | 1.4%                   | 1,815                            | 20,954              | 76.4%                     | 16,011                    |
| KHC    | Kraft Heinz Co                      | 9,425*                | 42.3%                  | 3,985                            | 41,408              | 88.4%                     | 36,609                    |
| KIM    | Kimco Realty                        | 86,800                | 13.4%                  | 11,623                           | 4,938               | 86.9%                     | 4,292                     |
| KLAC   | KLA-Tencor Corp.                    | 5,416*                | 21.3%                  | 1,153                            | 9,723               | 98.3%                     | 9,559                     |
| KMB    | Kimberly-Clark                      | 5,621*                | 50.2%                  | 2,822                            | 21,415              | 70.6%                     | 15,123                    |
| KMI    | Kinder Morgan                       | 27,750*               | 81.8%                  | 22,697                           | 70,923              | 89.4%                     | 63,419                    |
| KMX    | Carmax Inc                          | 6,869*                | 60.5%                  | 4,158                            | 12,869              | 86.6%                     | 11,150                    |
| KO     | The Coca Cola Company               | 129,118*              | 48.2%                  | 62,248                           | 164,462             | 83.5%                     | 137,392                   |
| KORS   | Michael Kors Holdings               | 6,540                 | 34.5%                  | 2,257                            | 1,697               | 90.1%                     | 1,530                     |
| KR     | Kroger Co.                          | 44,871*               | 72.6%                  | 32,594                           | 43,492              | 87.7%                     | 38,142                    |
| KSS    | Kohl's Corp.                        | 11,570*               | 12.7%                  | 1,468                            | 59,531              | 73.0%                     | 43,481                    |
| KSU    | Kansas City Southern                | 40,760                | 1.6%                   | 656                              | 10,154              | 36.1%                     | 3,667                     |
| L      | Loews Corp.                         | 1,220,000             | 2.3%                   | 27,938                           | 1,792               | 68.1%                     | 1,220                     |
| LB     | L Brands Inc.                       | 43,865*               | 24.4%                  | 10,690                           | 23,154              | 87.3%                     | 20,218                    |
| LEG    | Leggett & Platt                     | 58,850                | 0.3%                   | 165                              | 5,285               | 82.9%                     | 4,383                     |
| LEN    | Lennar Corp.                        | 16,353                | 2.3%                   | 376                              | 13,462              | 86.8%                     | 11,689                    |
| LENB   | Lennar Corp.                        | 90                    | 0.0%                   | 0                                | 510                 | 100.0%                    | 510                       |
| LH     | Laboratory Corp. of America Holding | 32,641                | 20.7%                  | 6,770                            | 9,500               | 34.5%                     | 3,281                     |

|               |                                  | Ticker Search  |                 |                  | Ticker Stock Search |               |                  |
|---------------|----------------------------------|----------------|-----------------|------------------|---------------------|---------------|------------------|
|               |                                  | (i)            | (ii)            | (iii)            | (iv)                | (v)           | (vi)             |
|               |                                  | <u>Keyword</u> | <u>Investor</u> | <u>Estimated</u> | <u>TS-</u>          | <u>TS-</u>    | <u>Estimated</u> |
| <u>Ticker</u> | <u>Name</u>                      | <u>Search</u>  | <u>Search</u>   | <u>(i)×(ii)</u>  | <u>Search</u>       | <u>Search</u> | <u>(iv)×(v)</u>  |
| LKQ           | LKQ Corporation                  | 160,500        | 0.3%            | 514              | 11,646              | 94.9%         | 11,052           |
| LLL           | L-3 Communications Holdings      | 52,800*        | 17.6%           | 9,266            | 402                 | 97.1%         | 390              |
| LLY           | Lilly (Eli) & Co.                | 14,820*        | 67.9%           | 10,066           | 36,585              | 90.7%         | 33,175           |
| LM            | Legg Mason                       | 27,100*        | 2.2%            | 585              | 693                 | 96.3%         | 667              |
| LMT           | Lockheed Martin Corp.            | 49,675*        | 47.4%           | 23,531           | 95,923              | 83.7%         | 80,336           |
| LNC           | Lincoln National                 | 3,993*         | 37.9%           | 1,515            | 8,177               | 85.3%         | 6,978            |
| LNT           | Alliant Energy Corp              | 2,756*         | 12.2%           | 335              | 252,308             | 80.9%         | 204,142          |
| LOW           | Lowe's Cos.                      | 62,775         | 29.1%           | 18,242           | 69,423              | 75.7%         | 52,525           |
| LRCX          | Lam Research                     | 14,805*        | 79.5%           | 11,764           | 41,431              | 87.1%         | 36,066           |
| LUK           | Leucadia National Corp.          | 5,012          | 50.4%           | 2,528            | 152                 | 100.0%        | 152              |
| LUV           | Southwest Airlines               | 41,145*        | 61.3%           | 25,201           | 195,769             | 100.0%        | 195,769          |
| LYB           | LyondellBasell                   | 2,289*         | 41.4%           | 947              | 8,562               | 78.3%         | 6,701            |
| M             | Macy's Inc.                      | 1,502,941*     | 2.2%            | 33,065           | 119,923             | 82.4%         | 98,853           |
| MA            | Mastercard Inc.                  | 258,941*       | 8.7%            | 22,502           | 69,654              | 95.0%         | 66,192           |
| MAC           | Macerich                         | 634,000        | 0.5%            | 3,297            | 55,031              | 89.1%         | 49,011           |
| MAR           | Marriott Int'l.                  | 197,300        | 21.2%           | 41,729           | 31,877              | 81.2%         | 25,897           |
| MAS           | Masco Corp.                      | 61,175         | 0.3%            | 171              | 1,938               | 81.6%         | 1,582            |
| MAT           | Mattel Inc.                      | 53,450*        | 18.9%           | 10,123           | 8,346               | 74.6%         | 6,224            |
| MCD           | McDonald's Corp.                 | 42,806*        | 54.1%           | 23,154           | 70,462              | 87.2%         | 61,471           |
| MCHP          | Microchip Technology             | 5,700*         | 68.1%           | 3,883            | 11,546              | 86.9%         | 10,038           |
| MCK           | McKesson Corp.                   | 14,720*        | 74.6%           | 10,975           | 14,231              | 96.4%         | 13,713           |
| MCO           | Moody's Corp                     | 46,225         | 1.5%            | 698              | 5,108               | 96.0%         | 4,905            |
| MDLZ          | Mondelez International           | 4,685*         | 33.8%           | 1,582            | 13,723              | 56.4%         | 7,747            |
| MDT           | Medtronic plc                    | 37,540         | 17.9%           | 6,723            | 35,023              | 75.9%         | 26,596           |
| MET           | MetLife Inc.                     | 79,775         | 82.2%           | 65,583           | 13,723              | 88.0%         | 12,072           |
| MHK           | Mohawk Industries                | 2,426*         | 9.3%            | 224              | 5,077               | 88.7%         | 4,503            |
| MKC           | McCormick & Co.                  | 5,912          | 5.7%            | 339              | 9,223               | 73.9%         | 6,815            |
| MLM           | Martin Marietta Materials        | 32,015         | 13.0%           | 4,172            | 7,331               | 73.1%         | 5,359            |
| MMC           | Marsh & McLennan                 | 17,110         | 3.8%            | 650              | 6,585               | 96.6%         | 6,362            |
| MMM           | 3M Company                       | 70,100*        | 21.2%           | 14,875           | 72,808              | 82.8%         | 60,278           |
| MNK           | Mallinckrodt Plc                 | 11,294*        | 50.6%           | 5,717            | 10,867              | 90.6%         | 9,849            |
| MNST          | Monster Beverage                 | 5,453*         | 58.7%           | 3,202            | 11,631              | 91.1%         | 10,595           |
| MO            | Altria Group Inc                 | 224,824*       | 28.1%           | 63,108           | 145,538             | 90.6%         | 131,930          |
| MON           | Monsanto Co.                     | 44,500         | 30.9%           | 13,737           | 630                 | 96.3%         | 607              |
| MOS           | The Mosaic Company               | 41,130         | 5.0%            | 2,052            | 20,215              | 92.5%         | 18,693           |
| MPC           | Marathon Petroleum               | 45,730         | 8.2%            | 3,732            | 95,269              | 82.2%         | 78,311           |
| MRK           | Merck & Co.                      | 32,241*        | 47.4%           | 15,295           | 72,154              | 87.3%         | 62,998           |
| MRO           | Marathon Oil Corp.               | 40,170         | 27.6%           | 11,075           | 193,231             | 100.0%        | 193,231          |
| MS            | Morgan Stanley                   | 334,500        | 2.8%            | 9,466            | 45,146              | 83.4%         | 37,661           |
| MSFT          | Microsoft Corp.                  | 191,050*       | 70.9%           | 135,359          | 779,000             | 78.3%         | 609,723          |
| MSI           | Motorola Solutions Inc.          | 127,575        | 0.2%            | 242              | 15,254              | 73.0%         | 11,138           |
| MTB           | M&T Bank Corp.                   | 93,875         | 0.3%            | 291              | 11,192              | 95.7%         | 10,707           |
| MU            | Micron Technology                | 188,467*       | 36.4%           | 68,527           | 233,077             | 89.7%         | 208,977          |
| MUR           | Murphy Oil                       | 7,806          | 59.5%           | 4,643            | 14,908              | 64.6%         | 9,629            |
| MYL           | Mylan N.V.                       | 14,605*        | 74.0%           | 10,814           | 3,304               | 84.2%         | 2,783            |
| NAVI          | Navient                          | 27,870         | 2.8%            | 775              | 5,269               | 86.1%         | 4,537            |
| NBL           | Noble Energy Inc                 | 13,285         | 1.4%            | 185              | 3,635               | 81.5%         | 2,963            |
| NDAQ          | NASDAQ OMX Group                 | 2,173*         | 68.3%           | 1,485            | 4,131               | 92.6%         | 3,823            |
| NEE           | NextEra Energy                   | 50,600*        | 8.3%            | 4,175            | 103,885             | 92.4%         | 95,990           |
| NEM           | Newmont Mining Corp. (Hldg. Co.) | 17,465         | 65.6%           | 11,459           | 23,900              | 86.8%         | 20,733           |
| NFLX          | Netflix Inc.                     | 205,450*       | 51.2%           | 105,129          | 638,000             | 84.2%         | 537,196          |
| NFX           | Newfield Exploration Co          | 2,130*         | 18.4%           | 393              | 214                 | 76.1%         | 163              |
| NI            | NiSource Inc.                    | 82,735*        | 0.3%            | 248              | 4,254               | 73.6%         | 3,132            |
| NKE           | Nike                             | 43,265*        | 53.0%           | 22,943           | 188,538             | 76.9%         | 145,061          |
| NLSN          | Nielsen Holdings                 | 1,681*         | 77.8%           | 1,307            | 1,835               | 78.8%         | 1,446            |
| NOC           | Northrop Grumman Corp.           | 29,625*        | 14.8%           | 4,379            | 30,985              | 84.1%         | 26,074           |
| NOV           | National Oilwell Varco Inc.      | 25,765         | 13.9%           | 3,568            | 11,531              | 0.0%          | 0                |

| Ticker | Name                         | Ticker Search         |                        |                                  | Ticker Stock Search |                           |                                  |
|--------|------------------------------|-----------------------|------------------------|----------------------------------|---------------------|---------------------------|----------------------------------|
|        |                              | (i)                   | (ii)                   | (iii)                            | (iv)                | (v)                       | (vi)                             |
|        |                              | <u>Keyword Search</u> | <u>Investor Search</u> | <u>Estimated Search (i)×(ii)</u> | <u>TS-Search</u>    | <u>TS-Investor Search</u> | <u>Estimated Search (iv)×(v)</u> |
| NRG    | NRG Energy                   | 47,035                | 5.4%                   | 2,559                            | 26,631              | 86.6%                     | 23,049                           |
| NSC    | Norfolk Southern Corp.       | 19,715*               | 9.0%                   | 1,780                            | 15,654              | 93.3%                     | 14,610                           |
| NTAP   | NetApp                       | 14,415*               | 64.7%                  | 9,325                            | 10,323              | 85.4%                     | 8,812                            |
| NTRS   | Northern Trust Corp.         | 3,476*                | 59.3%                  | 2,061                            | 1,900               | 72.5%                     | 1,377                            |
| NUE    | Nucor Corp.                  | 78,275*               | 21.8%                  | 17,033                           | 33,415              | 86.8%                     | 28,998                           |
| NVDA   | Nvidia Corporation           | 477,150*              | 73.9%                  | 352,757                          | 1,290,231           | 87.0%                     | 1,123,017                        |
| NWL    | Newell Rubbermaid Co.        | 5,184*                | 66.3%                  | 3,438                            | 11,408              | 79.3%                     | 9,043                            |
| NWS    | News Corp. Class B           | 410,500               | 0.0%                   | 41                               | 633                 | 51.3%                     | 325                              |
| NWSA   | News Corp. Class A           | 3,115                 | 1.9%                   | 59                               | 1,335               | 71.0%                     | 949                              |
| O      | Realty Income Corporation    | 658,529               | 7.4%                   | 48,665                           | 72,385              | 84.5%                     | 61,129                           |
| OI     | Owens-Illinois Inc.          | 7,113*                | 4.9%                   | 351                              | 3,662               | 78.4%                     | 2,872                            |
| OKE    | ONEOK                        | 7,089*                | 21.0%                  | 1,487                            | 62,308              | 85.9%                     | 53,516                           |
| OMC    | Omnicom Group                | 10,890                | 1.2%                   | 135                              | 5,708               | 97.1%                     | 5,545                            |
| ORCL   | Oracle Corp.                 | 137,730*              | 73.3%                  | 100,997                          | 59,169              | 81.1%                     | 48,016                           |
| ORLY   | O'Reilly Automotive          | 10,815*               | 13.3%                  | 1,441                            | 15,762              | 85.3%                     | 13,442                           |
| OXY    | Occidental Petroleum         | 21,255*               | 18.1%                  | 3,843                            | 267,615             | 0.0%                      | 0                                |
| PAYX   | Paychex Inc.                 | 2,919*                | 47.2%                  | 1,377                            | 71,892              | 89.9%                     | 64,652                           |
| PBCT   | People's United Financial    | 2,331*                | 72.2%                  | 1,682                            | 25,392              | 42.8%                     | 10,860                           |
| PBI    | Pitney-Bowes                 | 14,540*               | 8.4%                   | 1,214                            | 16,800              | 94.8%                     | 15,918                           |
| PCAR   | PACCAR Inc.                  | 4,144*                | 22.5%                  | 934                              | 6,231               | 87.1%                     | 5,426                            |
| PCG    | PG&E Corp.                   | 10,695*               | 20.6%                  | 2,201                            | 58,208              | 81.2%                     | 47,282                           |
| PCLN   | Priceline.com Inc            | 40,475*               | 73.3%                  | 29,676                           | 834                 | 93.9%                     | 783                              |
| PDCO   | Patterson Companies          | 3,475*                | 55.1%                  | 1,913                            | 2,992               | 65.2%                     | 1,952                            |
| PEG    | Public Serv. Enterprise Inc. | 55,635*               | 5.2%                   | 2,915                            | 11,600              | 38.7%                     | 4,495                            |
| PEP    | PepsiCo Inc.                 | 90,714*               | 5.9%                   | 5,370                            | 40,500              | 87.7%                     | 35,510                           |
| PFE    | Pfizer Inc.                  | 46,190*               | 78.3%                  | 36,162                           | 1,548,077           | 81.8%                     | 1,265,863                        |
| PFG    | Principal Financial Group    | 15,490*               | 38.3%                  | 5,934                            | 18,792              | 74.0%                     | 13,910                           |
| PG     | Procter & Gamble             | 52,735*               | 18.4%                  | 9,709                            | 149,231             | 85.8%                     | 128,070                          |
| PGR    | Progressive Corp.            | 8,130*                | 30.2%                  | 2,454                            | 13,723              | 89.2%                     | 12,245                           |
| PH     | Parker-Hannifin              | 96,588                | 0.6%                   | 599                              | 9,715               | 79.7%                     | 7,742                            |
| PHM    | Pulte Homes Inc.             | 23,400*               | 24.2%                  | 5,656                            | 6,869               | 83.2%                     | 5,716                            |
| PKI    | PerkinElmer                  | 10,360                | 0.1%                   | 7                                | 5,485               | 84.0%                     | 4,606                            |
| PLD    | Prologis                     | 7,242*                | 45.3%                  | 3,284                            | 7,846               | 86.6%                     | 6,798                            |
| PM     | Philip Morris International  | 142,059*              | 14.0%                  | 19,831                           | 35,485              | 83.6%                     | 29,680                           |
| PNC    | PNC Financial Services       | 1,472,000             | 0.1%                   | 1,472                            | 28,385              | 63.6%                     | 18,059                           |
| PNR    | Pentair Ltd.                 | 6,485                 | 1.1%                   | 74                               | 2,700               | 94.0%                     | 2,539                            |
| PNW    | Pinnacle West Capital        | 21,050                | 2.2%                   | 457                              | 4,800               | 97.1%                     | 4,661                            |
| PPG    | PPG Industries               | 40,000                | 61.5%                  | 24,612                           | 24,231              | 100.0%                    | 24,231                           |
| PPL    | PPL Corp.                    | 121,250               | 0.8%                   | 1,019                            | 42,977              | 77.6%                     | 33,337                           |
| PRGO   | Perrigo                      | 5,067*                | 81.0%                  | 4,104                            | 2,177               | 82.5%                     | 1,796                            |
| PRU    | Prudential Financial         | 92,305*               | 55.1%                  | 50,851                           | 42,131              | 87.9%                     | 37,042                           |
| PSA    | Public Storage               | 122,500               | 0.5%                   | 662                              | 8,169               | 81.1%                     | 6,621                            |
| PSX    | Phillips 66                  | 33,090*               | 28.5%                  | 9,427                            | 51,431              | 87.9%                     | 45,228                           |
| PVH    | PVH Corp.                    | 15,190                | 6.5%                   | 986                              | 8,846               | 78.1%                     | 6,905                            |
| PWR    | Quanta Services Inc.         | 7,665                 | 2.7%                   | 210                              | 5,608               | 90.7%                     | 5,087                            |
| PX     | Praxair Inc.                 | 31,324*               | 0.9%                   | 273                              | 274                 | 100.0%                    | 274                              |
| PXD    | Pioneer Natural Resources    | 5,539*                | 44.1%                  | 2,445                            | 12,323              | 66.9%                     | 8,244                            |
| PYPL   | PayPal                       | 36,355*               | 77.1%                  | 28,019                           | 196,077             | 91.6%                     | 179,665                          |
| QCOM   | QUALCOMM Inc.                | 165,800*              | 74.8%                  | 124,085                          | 159,000             | 81.9%                     | 130,173                          |
| QRVO   | Qorvo                        | 9,489*                | 70.5%                  | 6,686                            | 21,900              | 82.9%                     | 18,159                           |
| R      | Ryder System                 | 805,353               | 0.4%                   | 2,980                            | 13,723              | 50.1%                     | 6,871                            |
| RCL    | Royal Caribbean Cruises Ltd  | 15,085                | 10.9%                  | 1,649                            | 217,538             | 100.0%                    | 217,538                          |
| REGN   | Regeneron                    | 27,515*               | 68.2%                  | 18,754                           | 60,462              | 86.7%                     | 52,439                           |
| RF     | Regions Financial Corp.      | 40,688*               | 19.3%                  | 7,861                            | 17,462              | 83.7%                     | 14,621                           |
| RHI    | Robert Half International    | 3,973*                | 23.2%                  | 920                              | 1,406               | 68.8%                     | 968                              |
| RHT    | Red Hat Inc.                 | 11,375*               | 59.0%                  | 6,710                            | 977                 | 72.8%                     | 712                              |
| RIG    | Transocean                   | 50,450*               | 50.5%                  | 25,477                           | 116,346             | 81.2%                     | 94,461                           |

| Ticker | Name                              | Ticker Search         |                        |                                  | Ticker Stock Search      |                           |                                  |
|--------|-----------------------------------|-----------------------|------------------------|----------------------------------|--------------------------|---------------------------|----------------------------------|
|        |                                   | (i)                   | (ii)                   | (iii)                            | (iv)                     | (v)                       | (vi)                             |
|        |                                   | <u>Keyword Search</u> | <u>Investor Search</u> | <u>Estimated Search (i)×(ii)</u> | <u>TS-keyword Search</u> | <u>TS-Investor Search</u> | <u>Estimated Search (iv)×(v)</u> |
| RL     | Polo Ralph Lauren Corp.           | 23,159*               | 25.7%                  | 5,947                            | 6,215                    | 77.4%                     | 4,810                            |
| ROK    | Rockwell Automation Inc.          | 15,500*               | 12.0%                  | 1,854                            | 5,462                    | 68.5%                     | 3,743                            |
| ROP    | Roper Industries                  | 14,155*               | 0.8%                   | 112                              | 3,108                    | 72.8%                     | 2,263                            |
| ROST   | Ross Stores                       | 6,955*                | 61.6%                  | 4,286                            | 6,892                    | 80.4%                     | 5,543                            |
| RRC    | Range Resources Corp.             | 8,870*                | 28.9%                  | 2,563                            | 14,085                   | 81.9%                     | 11,537                           |
| RSG    | Republic Services Inc             | 5,432*                | 16.7%                  | 905                              | 4,900                    | 49.7%                     | 2,437                            |
| RTN    | Raytheon Co.                      | 17,245*               | 83.2%                  | 14,341                           | 3,454                    | 85.9%                     | 2,968                            |
| SBUX   | Starbucks Corp.                   | 67,750*               | 49.5%                  | 33,509                           | 86,769                   | 86.0%                     | 74,578                           |
| SCG    | SCANA Corp                        | 27,920*               | 1.5%                   | 419                              | 170                      | 71.9%                     | 122                              |
| SCHW   | Charles Schwab Corporation        | 8,465*                | 39.3%                  | 3,330                            | 11,908                   | 87.2%                     | 10,379                           |
| SEE    | Sealed Air Corp.                  | 84,050                | 4.7%                   | 3,942                            | 2,808                    | 94.5%                     | 2,653                            |
| SHW    | Sherwin-Williams Company          | 17,408*               | 47.6%                  | 8,284                            | 22,338                   | 94.8%                     | 21,188                           |
| SIG    | Signet Jewelers                   | 46,450                | 1.1%                   | 520                              | 14,877                   | 82.3%                     | 12,250                           |
| SJM    | Smucker (J.M.)                    | 4,711*                | 72.1%                  | 3,396                            | 7,508                    | 33.8%                     | 2,540                            |
| SLB    | Schlumberger Ltd.                 | 14,380*               | 38.1%                  | 5,474                            | 55,577                   | 86.5%                     | 48,080                           |
| SLG    | SL Green Realty                   | 13,436*               | 0.7%                   | 99                               | 9,169                    | 87.6%                     | 8,031                            |
| SNA    | Snap-On Inc.                      | 34,280                | 4.0%                   | 1,361                            | 5,046                    | 79.8%                     | 4,027                            |
| SNI    | Scripps Networks Interactive Inc. | 6,435                 | 16.2%                  | 1,041                            | 74                       | 100.0%                    | 74                               |
| SO     | Southern Co.                      | 173,471*              | 14.9%                  | 25,899                           | 36,054                   | 86.0%                     | 30,992                           |
| SPG    | Simon Property Group Inc          | 260,250               | 0.2%                   | 468                              | 114,538                  | 77.8%                     | 89,053                           |
| SPGI   | S&P Global Inc.                   | 2,054                 | 82.7%                  | 1,698                            | 9,062                    | 79.8%                     | 7,231                            |
| SRCL   | Stericycle Inc                    | 2,950*                | 72.1%                  | 2,127                            | 217,538                  | 91.5%                     | 199,134                          |
| SRE    | Sempra Energy                     | 18,755                | 13.2%                  | 2,472                            | 10,169                   | 81.3%                     | 8,267                            |
| STI    | SunTrust Banks                    | 85,700                | 1.1%                   | 926                              | 560                      | 94.4%                     | 529                              |
| STT    | State Street Corp.                | 12,384*               | 42.8%                  | 5,302                            | 368,385                  | 93.6%                     | 344,735                          |
| STX    | Seagate Technology                | 17,750*               | 30.9%                  | 5,483                            | 40                       | 87.7%                     | 35                               |
| STZ    | Constellation Brands              | 9,236*                | 69.5%                  | 6,418                            | 17,569                   | 89.5%                     | 15,728                           |
| SWK    | Stanley Black & Decker            | 5,550*                | 80.8%                  | 4,484                            | 6,138                    | 61.6%                     | 3,782                            |
| SWKS   | Skyworks Solutions                | 20,240*               | 38.8%                  | 7,859                            | 37,108                   | 86.9%                     | 32,243                           |
| SWN    | Southwestern Energy               | 12,725*               | 72.3%                  | 9,200                            | 34,854                   | 91.2%                     | 31,776                           |
| SYF    | Synchrony Financial               | 5,947*                | 93.7%                  | 5,574                            | 9,992                    | 82.6%                     | 8,253                            |
| SYK    | Stryker Corp.                     | 5,357*                | 68.0%                  | 3,640                            | 7,962                    | 65.0%                     | 5,178                            |
| SYMC   | Symantec Corp.                    | 60,875*               | 74.0%                  | 45,041                           | 216                      | 82.0%                     | 177                              |
| SYY    | Sysco Corp.                       | 7,368*                | 53.8%                  | 3,963                            | 16,077                   | 89.6%                     | 14,408                           |
| T      | AT&T Inc                          | 1,077,647             | 25.1%                  | 270,489                          | 444,077                  | 50.9%                     | 226,168                          |
| TAP    | Molson Coors Brewing Company      | 140,500               | 0.2%                   | 225                              | 26,477                   | 85.6%                     | 22,670                           |
| TAPA   | Molson Coors Brewing Company      | 123,300               | 0.0%                   | 0                                | 30                       | 85.6%                     | 26                               |
| TDC    | Teradata Corp.                    | 16,160*               | 21.8%                  | 3,528                            | 11,500                   | 69.3%                     | 7,973                            |
| TDG    | TransDigm Group                   | 4,559*                | 55.6%                  | 2,536                            | 6,400                    | 88.6%                     | 5,668                            |
| TEL    | TE Connectivity Ltd.              | 22,115*               | 0.6%                   | 135                              | 3,938                    | 75.5%                     | 2,971                            |
| TGNA   | Tegna                             | 989*                  | 60.3%                  | 597                              | 1,435                    | 95.2%                     | 1,367                            |
| TGT    | Target Corp.                      | 20,840*               | 48.1%                  | 10,030                           | 104,808                  | 86.4%                     | 90,596                           |
| TIF    | Tiffany & Co.                     | 20,890                | 12.7%                  | 2,655                            | 3,909                    | 70.9%                     | 2,771                            |
| TJX    | TJX Companies Inc.                | 38,730                | 4.1%                   | 1,588                            | 31,677                   | 79.4%                     | 25,142                           |
| TMK    | Torchmark Corp.                   | 2,870*                | 17.1%                  | 491                              | 124                      | 64.3%                     | 80                               |
| TMO    | Thermo Fisher Scientific          | 24,950*               | 5.5%                   | 1,375                            | 33,477                   | 65.6%                     | 21,958                           |
| TRIP   | TripAdvisor                       | 71,500                | 1.6%                   | 1,173                            | 19,285                   | 69.3%                     | 13,355                           |
| TROW   | T. Rowe Price Group               | 7,455                 | 17.4%                  | 1,299                            | 6,108                    | 0.0%                      | 0                                |
| TRV    | The Travelers Companies Inc.      | 4,635*                | 35.3%                  | 1,634                            | 7,015                    | 0.0%                      | 0                                |
| TSCO   | Tractor Supply Company            | 5,540                 | 68.0%                  | 3,767                            | 13,892                   | 85.3%                     | 11,855                           |
| TSN    | Tyson Foods                       | 73,125                | 1.8%                   | 1,331                            | 24,915                   | 74.9%                     | 18,654                           |
| TSS    | Total System Services             | 53,780                | 5.2%                   | 2,813                            | 257                      | 100.0%                    | 257                              |
| TWX    | Time Warner Inc.                  | 14,120                | 75.6%                  | 10,676                           | 1,729                    | 89.0%                     | 1,539                            |
| TXN    | Texas Instruments                 | 23,585*               | 84.1%                  | 19,844                           | 27,000                   | 85.6%                     | 23,101                           |
| TXT    | Textron Inc.                      | 15,790*               | 34.4%                  | 5,430                            | 12,054                   | 73.0%                     | 8,795                            |
| UA     | Under Armour                      | 102,618               | 19.8%                  | 20,288                           | 26,346                   | 86.8%                     | 22,868                           |
| UAL    | United Continental Holdings       | 79,675                | 23.5%                  | 18,692                           | 388,923                  | 0.0%                      | 0                                |

| Ticker | Name                                 | Ticker Search         |                        |                                  | Ticker Stock Search      |                           |                                  |
|--------|--------------------------------------|-----------------------|------------------------|----------------------------------|--------------------------|---------------------------|----------------------------------|
|        |                                      | (i)                   | (ii)                   | (iii)                            | (iv)                     | (v)                       | (vi)                             |
|        |                                      | <u>Keyword Search</u> | <u>Investor Search</u> | <u>Estimated Search (i)×(ii)</u> | <u>TS-keyword Search</u> | <u>TS-Investor Search</u> | <u>Estimated Search (iv)×(v)</u> |
| UDR    | UDR Inc                              | 7,545                 | 1.3%                   | 97                               | 2,254                    | 86.3%                     | 1,945                            |
| UHS    | Universal Health Services Inc.       | 35,260                | 0.4%                   | 130                              | 5,315                    | 82.0%                     | 4,356                            |
| ULTA   | Ulta Salon Cosmetics & Fragrance Inc | 2,818,500             | 0.5%                   | 12,683                           | 46,323                   | 87.1%                     | 40,338                           |
| UNH    | United Health Group Inc.             | 41,720                | 6.8%                   | 2,845                            | 74,923                   | 78.8%                     | 59,054                           |
| UNM    | Unum Group                           | 35,020                | 0.0%                   | 0                                | 8,762                    | 87.0%                     | 7,622                            |
| UNP    | Union Pacific                        | 13,235*               | 64.4%                  | 8,526                            | 26,100                   | 97.0%                     | 25,314                           |
| UPS    | United Parcel Service                | 3,645,000             | 0.3%                   | 10,206                           | 347,385                  | 79.7%                     | 276,796                          |
| URBN   | Urban Outfitters                     | 10,825                | 16.7%                  | 1,802                            | 4,115                    | 93.5%                     | 3,848                            |
| URI    | United Rentals Inc.                  | 59,775                | 4.0%                   | 2,367                            | 10,254                   | 51.2%                     | 5,255                            |
| USB    | U.S. Bancorp                         | 74,000                | 2.2%                   | 1,643                            | 29,662                   | 42.0%                     | 12,467                           |
| UTX    | United Technologies                  | 26,585*               | 60.7%                  | 16,132                           | 5,869                    | 88.9%                     | 5,217                            |
| V      | Visa Inc.                            | 854,235*              | 3.3%                   | 28,275                           | 107,231                  | 88.9%                     | 95,275                           |
| VAR    | Varian Medical Systems               | 16,450                | 1.1%                   | 173                              | 1,464                    | 92.0%                     | 1,346                            |
| VFC    | V.F. Corp.                           | 8,100*                | 21.3%                  | 1,722                            | 9,808                    | 74.4%                     | 7,302                            |
| VIAB   | Viacom Inc.                          | 4,200*                | 83.3%                  | 3,500                            | 43,800                   | 76.3%                     | 33,419                           |
| VLO    | Valero Energy                        | 14,729*               | 50.9%                  | 7,490                            | 56,808                   | 95.5%                     | 54,235                           |
| VMC    | Vulcan Materials                     | 8,085*                | 8.9%                   | 716                              | 6,885                    | 90.2%                     | 6,212                            |
| VNO    | Vornado Realty Trust                 | 1,525*                | 42.0%                  | 641                              | 6,777                    | 78.1%                     | 5,292                            |
| VRSK   | Verisk Analytics                     | 3,050*                | 82.7%                  | 2,522                            | 2,854                    | 70.2%                     | 2,004                            |
| VRSN   | Verisign Inc.                        | 3,188*                | 78.4%                  | 2,499                            | 2,777                    | 85.3%                     | 2,368                            |
| VRTX   | Vertex Pharmaceuticals Inc           | 9,070*                | 59.8%                  | 5,426                            | 55,323                   | 90.2%                     | 49,929                           |
| VTR    | Ventas Inc                           | 6,330*                | 28.8%                  | 1,825                            | 39,577                   | 75.0%                     | 29,687                           |
| VZ     | Verizon Communications               | 75,676*               | 56.7%                  | 42,939                           | 178,462                  | 88.1%                     | 157,171                          |
| WAT    | Waters Corporation                   | 72,275*               | 0.2%                   | 116                              | 1,815                    | 91.9%                     | 1,669                            |
| WBA    | Walgreens Boots Alliance             | 18,347*               | 34.0%                  | 6,234                            | 84,731                   | 87.7%                     | 74,292                           |
| WDC    | Western Digital                      | 20,635*               | 45.6%                  | 9,412                            | 49,285                   | 84.1%                     | 41,439                           |
| WEC    | Wisconsin Energy Corporation         | 9,680                 | 3.6%                   | 345                              | 14,523                   | 58.1%                     | 8,431                            |
| WFC    | Wells Fargo                          | 82,825*               | 63.7%                  | 52,726                           | 284,000                  | 88.2%                     | 250,545                          |
| WHR    | Whirlpool Corp.                      | 9,422*                | 66.7%                  | 6,286                            | 12,162                   | 89.3%                     | 10,864                           |
| WLTW   | Willis Towers Watson                 | 1,056*                | 37.7%                  | 398                              | 1,623                    | 74.4%                     | 1,208                            |
| WM     | Waste Management Inc.                | 33,971*               | 2.0%                   | 693                              | 33,046                   | 88.8%                     | 29,348                           |
| WMB    | Williams Cos.                        | 11,685*               | 63.8%                  | 7,455                            | 16,331                   | 81.4%                     | 13,295                           |
| WMT    | Wal-Mart Stores                      | 66,975*               | 69.1%                  | 46,266                           | 239,538                  | 86.7%                     | 207,703                          |
| WRK    | Westrock Co                          | 2,720*                | 13.1%                  | 355                              | 10,677                   | 93.1%                     | 9,945                            |
| WU     | Western Union Co                     | 33,100*               | 1.8%                   | 596                              | 3,177                    | 96.8%                     | 3,077                            |
| WY     | Weyerhaeuser Corp.                   | 18,147*               | 21.9%                  | 3,980                            | 15,862                   | 81.2%                     | 12,886                           |
| WYN    | Wyndham Worldwide                    | 4,129                 | 52.4%                  | 2,162                            | 306                      | 96.5%                     | 295                              |
| WYNN   | Wynn Resorts Ltd                     | 40,253*               | 41.9%                  | 16,870                           | 112,269                  | 73.0%                     | 81,945                           |
| XEC    | Cimarex Energy                       | 1,750*                | 84.0%                  | 1,470                            | 3,423                    | 83.6%                     | 2,862                            |
| XEL    | Xcel Energy Inc                      | 4,333*                | 35.3%                  | 1,528                            | 6,538                    | 63.5%                     | 4,153                            |
| XL     | XL Capital                           | 18,965                | 4.7%                   | 889                              | 47,549                   | 65.4%                     | 31,111                           |
| XLNX   | Xilinx Inc                           | 6,495*                | 67.1%                  | 4,357                            | 17,215                   | 88.3%                     | 15,206                           |
| XOM    | Exxon Mobil Corp.                    | 122,300*              | 84.0%                  | 102,683                          | 381,231                  | 83.9%                     | 319,738                          |
| XRAY   | Dentsply Sirona                      | 98,300                | 2.4%                   | 2,340                            | 3,269                    | 89.5%                     | 2,925                            |
| XRX    | Xerox Corp.                          | 5,774*                | 78.8%                  | 4,549                            | 17,692                   | 82.4%                     | 14,585                           |
| XYL    | Xylem Inc.                           | 1,185*                | 25.4%                  | 301                              | 2,062                    | 89.1%                     | 1,837                            |
| YUM    | Yum! Brands Inc                      | 31,845*               | 42.5%                  | 13,518                           | 18,331                   | 76.3%                     | 13,994                           |
| ZBH    | Zimmer Biomet Holdings               | 2,900*                | 59.5%                  | 1,725                            | 4,954                    | 91.1%                     | 4,514                            |
| ZION   | Zions Bancorp                        | 74,450                | 0.3%                   | 194                              | 4,085                    | 67.6%                     | 2,761                            |
| ZTS    | Zoetis                               | 2,917*                | 95.6%                  | 2,787                            | 8,646                    | 94.2%                     | 8,142                            |

## SM2 – Complete tabulation of Table 4: SVI around EAs, by decile of *Noise Search*, with controls and week fixed effects

This table presents the full results from the analyses Panel B of Table 4. Panel A of this table is for SVI, Panel B of this table is for ASVI, and Panel C of this table is for ASVI2. See Table 4 for further details. Variable definitions are provided in Appendix A. T-statistics are in parentheses. Standard errors are clustered by firm. \*, \*\*, \*\*\* indicates statistical significance at the  $p < 0.10, 0.05, 0.01$  level, respectively.

### Panel A: SVI

|                                              | <u>Pooled</u>       | <u>By Decile of <i>Noise Search</i></u> |                      |                      |                      |                        |                     |                     |                    |                      |                     |
|----------------------------------------------|---------------------|-----------------------------------------|----------------------|----------------------|----------------------|------------------------|---------------------|---------------------|--------------------|----------------------|---------------------|
|                                              |                     | <u>1 [Low]</u>                          | <u>2</u>             | <u>3</u>             | <u>4</u>             | <u>5</u>               | <u>6</u>            | <u>7</u>            | <u>8</u>           | <u>9</u>             | <u>10 [High]</u>    |
| <i>SVI</i>                                   | 7.879***<br>(5.17)  | 12.340***<br>(6.60)                     | 19.330***<br>(7.73)  | 14.592***<br>(3.98)  | 11.955***<br>(5.31)  | 4.801<br>(1.60)        | 4.834**<br>(2.09)   | -3.350<br>(-0.99)   | -0.221<br>(-0.06)  | 5.029<br>(1.27)      | 4.470**<br>(2.07)   |
| <i>News Articles<sub>i,t</sub></i>           | 0.345*<br>(1.92)    | 0.586***<br>(4.15)                      | 0.303<br>(1.36)      | 0.794**<br>(2.34)    | 0.378*<br>(1.71)     | 0.771*<br>(1.85)       | 0.524*<br>(1.98)    | 0.996**<br>(2.35)   | 0.302<br>(0.71)    | -0.308<br>(-0.61)    | -0.469**<br>(-2.36) |
| <i>Abs Return<sub>i,t</sub></i>              | 92.780***<br>(7.53) | 89.380***<br>(5.08)                     | 129.000***<br>(5.29) | 171.300***<br>(6.31) | 118.000***<br>(3.32) | 72.510***<br>(3.11)    | 74.890***<br>(2.95) | 85.010***<br>(3.21) | 1.013<br>(0.04)    | 43.250<br>(1.38)     | 28.000<br>(0.57)    |
| <i>MVE<sub>i,q</sub></i>                     | 0.773**<br>(2.04)   | 1.287***<br>(2.81)                      | 0.591<br>(0.91)      | 0.701<br>(0.80)      | 0.227<br>(0.18)      | 2.045**<br>(2.04)      | 1.887<br>(1.51)     | 2.570*<br>(1.92)    | 3.765***<br>(3.39) | 1.508<br>(1.07)      | 1.421<br>(1.51)     |
| <i>Trading Volume<sub>i,t</sub></i>          | 0.417<br>(0.44)     | 0.881<br>(0.72)                         | 0.116<br>(0.11)      | -0.230<br>(-0.19)    | 3.296*<br>(1.74)     | 8.439***<br>(3.09)     | 2.713<br>(0.82)     | 4.501<br>(1.11)     | -1.286<br>(-0.42)  | 6.290<br>(1.61)      | -1.370<br>(-0.32)   |
| <i>Spread<sub>i,t</sub></i>                  | -52.370<br>(-1.255) | 116.800**<br>(2.532)                    | 120.30**<br>(2.212)  | 4.168<br>(0.05)      | -70.130<br>(-0.91)   | -290.200***<br>(-2.73) | -130.900<br>(-1.42) | -16.960<br>(-0.16)  | 101.600<br>(1.05)  | -105.200<br>(-1.08)  | -71.730<br>(-0.53)  |
| <i>Fourth Qtr<sub>i,t</sub></i>              | -0.593<br>(-1.17)   | -0.790<br>(-0.93)                       | -0.301<br>(-0.43)    | -0.682<br>(-0.56)    | -0.377<br>(-0.38)    | 2.088<br>(0.97)        | -1.493<br>(-1.06)   | 2.067<br>(1.44)     | -0.294<br>(-0.21)  | -4.973**<br>(-2.55)  | -0.517<br>(-0.29)   |
| <i>Total EAs<sub>t</sub></i>                 | 0.134***<br>(6.52)  | 0.085*<br>(1.99)                        | 0.091<br>(1.47)      | 0.027<br>(0.45)      | 0.064<br>(0.98)      | 0.189***<br>(2.81)     | 0.266***<br>(4.13)  | 0.100<br>(1.51)     | 0.172**<br>(2.57)  | 0.099*<br>(1.71)     | 0.142**<br>(2.04)   |
| <i>Analyst Following<sub>i,t</sub></i>       | -5.042**<br>(-2.31) | -4.889*<br>(-1.90)                      | -7.719**<br>(-2.39)  | -3.975<br>(-0.71)    | -5.912<br>(-1.32)    | -8.297*<br>(-1.90)     | 4.477<br>(0.67)     | 0.105<br>(0.015)    | -1.882<br>(-0.28)  | -11.920*<br>(-1.78)  | -2.955<br>(-0.74)   |
| <i>Institutional Ownership<sub>i,q</sub></i> | -6.195<br>(-1.05)   | -6.135<br>(-0.91)                       | -11.680<br>(-1.14)   | -8.618<br>(-0.56)    | -12.080<br>(-0.56)   | -42.510*<br>(-1.78)    | -33.350<br>(-1.59)  | -3.362<br>(-0.13)   | 0.865<br>(0.05)    | -47.890**<br>(-2.51) | 34.070**<br>(2.44)  |
| <i>BTM<sub>i,q</sub></i>                     | 0.538*<br>(1.73)    | 0.132<br>(0.31)                         | -0.294<br>(-0.53)    | 0.777<br>(1.44)      | -0.314<br>(-0.42)    | -1.561*<br>(-1.89)     | -0.014<br>(-0.02)   | 0.521<br>(0.58)     | 1.155<br>(1.47)    | -0.491<br>(-0.49)    | 0.973<br>(1.23)     |
| Constant                                     | 43.740***<br>(5.44) | 19.530**<br>(2.21)                      | 45.240***<br>(2.70)  | 30.090*<br>(1.69)    | 49.400**<br>(2.09)   | 77.260***<br>(2.79)    | 37.310<br>(1.42)    | 16.430<br>(0.66)    | 18.140<br>(0.87)   | 101.300***<br>(3.68) | 22.990*<br>(1.72)   |
| Year-Week FE                                 | Included            | Included                                | Included             | Included             | Included             | Included               | Included            | Included            | Included           | Included             | Included            |
| N                                            | 245,015             | 24,970                                  | 24,048               | 24,549               | 24,548               | 25,050                 | 24,283              | 24,549              | 24,048             | 24,922               | 24,048              |
| Adjusted R-squared                           | 0.030               | 0.132                                   | 0.111                | 0.128                | 0.064                | 0.135                  | 0.126               | 0.105               | 0.240              | 0.142                | 0.147               |

*Panel B: ASVI*

|                                              | <b>Pooled</b>        | <b>By Decile of Noise Search</b> |                      |                      |                     |                      |                   |                   |                   |                    |                   |
|----------------------------------------------|----------------------|----------------------------------|----------------------|----------------------|---------------------|----------------------|-------------------|-------------------|-------------------|--------------------|-------------------|
|                                              |                      | <b>1 [Low]</b>                   | <b>2</b>             | <b>3</b>             | <b>4</b>            | <b>5</b>             | <b>6</b>          | <b>7</b>          | <b>8</b>          | <b>9</b>           | <b>10 [High]</b>  |
| <i>ASVI</i>                                  | 0.470***<br>(13.08)  | 1.858***<br>(6.19)               | 1.901***<br>(5.98)   | 1.539***<br>(5.28)   | 0.723***<br>(4.76)  | 0.186<br>(1.36)      | -0.012<br>(-0.06) | 0.168*<br>(1.86)  | 0.106<br>(1.58)   | 0.046**<br>(2.03)  | 0.001<br>(0.04)   |
| <i>News Articles<sub>i,t</sub></i>           | 0.010***<br>(8.32)   | 0.054***<br>(5.38)               | 0.031***<br>(4.78)   | 0.027***<br>(2.84)   | 0.023***<br>(4.91)  | 0.019*<br>(1.73)     | 0.032<br>(1.27)   | 0.005**<br>(2.12) | -0.002<br>(-0.39) | 0.002<br>(0.81)    | -0.001<br>(-1.01) |
| <i>Abs Return<sub>i,t</sub></i>              | 3.098***<br>(9.82)   | 14.110***<br>(5.81)              | 13.890***<br>(5.72)  | 8.694***<br>(4.48)   | 5.913***<br>(3.53)  | 0.573<br>(0.41)      | 3.651*<br>(1.76)  | 0.066<br>(0.10)   | -2.818<br>(-0.83) | -0.647<br>(-1.54)  | -0.070<br>(-0.20) |
| <i>MVE<sub>i,q</sub></i>                     | 0.000<br>(0.45)      | -0.029*<br>(-1.90)               | -0.028<br>(-1.60)    | -0.021*<br>(-1.69)   | -0.006<br>(-0.61)   | -0.003<br>(-0.26)    | -0.050<br>(-1.39) | -0.004<br>(-1.02) | -0.025<br>(-1.23) | -0.006<br>(-1.19)  | 0.000<br>(0.30)   |
| <i>Trading Volume<sub>i,t</sub></i>          | -0.028***<br>(-6.65) | -0.124***<br>(-2.96)             | -0.141***<br>(-3.30) | -0.104***<br>(-2.88) | -0.073**<br>(-2.56) | -0.047<br>(-1.65)    | -0.122<br>(-1.43) | -0.015<br>(-1.19) | 0.031<br>(0.62)   | -0.027*<br>(-1.70) | -0.006<br>(-0.90) |
| <i>Spread<sub>i,t</sub></i>                  | 4.269***<br>(9.47)   | 16.580***<br>(4.17)              | 11.330***<br>(3.78)  | 13.760***<br>(3.84)  | 8.707***<br>(3.26)  | 4.841**<br>(2.39)    | 0.438<br>(0.14)   | 2.641**<br>(2.29) | -0.004<br>(-0.01) | 1.627<br>(1.40)    | 0.602<br>(1.32)   |
| <i>Fourth Qtr<sub>i,t</sub></i>              | -0.032**<br>(-2.20)  | -0.252**<br>(-2.40)              | -0.041<br>(-0.69)    | 0.009<br>(0.19)      | -0.054<br>(-0.90)   | -0.018<br>(-0.54)    | 0.011<br>(0.17)   | 0.016<br>(0.82)   | 0.076<br>(0.87)   | -0.133*<br>(-1.94) | -0.023<br>(-0.65) |
| <i>Total EAs<sub>t</sub></i>                 | -0.005***<br>(-5.24) | -0.008<br>(-1.17)                | -0.018**<br>(-2.53)  | -0.027***<br>(-3.18) | -0.018**<br>(-2.56) | -0.013***<br>(-2.73) | 0.008<br>(1.44)   | -0.004<br>(-1.10) | 0.010<br>(0.95)   | -0.002<br>(-1.15)  | -0.001<br>(-0.38) |
| <i>Analyst Following<sub>i,t</sub></i>       | -0.002<br>(-0.19)    | -0.060<br>(-0.72)                | -0.016<br>(-0.28)    | -0.031<br>(-0.27)    | 0.031<br>(1.06)     | 0.013<br>(0.35)      | -0.130<br>(-0.58) | -0.008<br>(-0.31) | 0.193<br>(1.00)   | 0.011<br>(0.46)    | 0.002<br>(0.28)   |
| <i>Institutional Ownership<sub>i,q</sub></i> | 0.069***<br>(2.81)   | 0.315<br>(1.48)                  | 0.232<br>(1.45)      | -0.038<br>(-0.25)    | 0.078<br>(0.41)     | 0.458**<br>(2.37)    | 0.503<br>(1.53)   | -0.022<br>(-0.18) | -0.133<br>(-0.82) | 0.102*<br>(1.70)   | -0.003<br>(-0.12) |
| <i>BTM<sub>i,q</sub></i>                     | -0.003**<br>(-2.36)  | -0.021**<br>(-2.33)              | 0.005<br>(0.57)      | -0.014*<br>(-2.00)   | 0.001<br>(0.074)    | 0.002<br>(0.43)      | -0.010<br>(-0.47) | -0.002<br>(-0.75) | 0.010<br>(0.67)   | 0.006<br>(1.52)    | -0.000<br>(-0.15) |
| Constant                                     | -0.033<br>(-0.99)    | 0.195<br>(0.71)                  | 0.099<br>(0.309)     | 0.369<br>(1.22)      | -0.034<br>(-0.15)   | -0.293<br>(-1.28)    | 0.498<br>(0.69)   | 0.088<br>(0.91)   | -0.367<br>(-0.75) | -0.028<br>(-0.25)  | 0.020<br>(0.80)   |
| Year-Week FE                                 | Included             | Included                         | Included             | Included             | Included            | Included             | Included          | Included          | Included          | Included           | Included          |
| N                                            | 245,015              | 24,970                           | 24,048               | 24,549               | 24,548              | 25,050               | 24,283            | 24,549            | 24,048            | 24,922             | 24,048            |
| Adjusted R-squared                           | 0.037                | 0.077                            | 0.084                | 0.065                | 0.043               | 0.015                | 0.018             | 0.029             | 0.008             | 0.027              | 0.009             |

*Panel C: ASVI2*

|                                              | <b>Pooled</b>        | <b>By Decile of Noise Search</b> |                      |                      |                      |                      |                    |                    |                     |                     |                    |
|----------------------------------------------|----------------------|----------------------------------|----------------------|----------------------|----------------------|----------------------|--------------------|--------------------|---------------------|---------------------|--------------------|
|                                              |                      | <b>1 [Low]</b>                   | <b>2</b>             | <b>3</b>             | <b>4</b>             | <b>5</b>             | <b>6</b>           | <b>7</b>           | <b>8</b>            | <b>9</b>            | <b>10 [High]</b>   |
| <i>ASVI2</i>                                 | 0.297***<br>(13.50)  | 0.702***<br>(9.32)               | 0.759***<br>(9.31)   | 0.672***<br>(8.02)   | 0.379***<br>(6.41)   | 0.199***<br>(3.77)   | 0.147***<br>(3.74) | 0.073*<br>(1.68)   | 0.086***<br>(2.69)  | 0.0367*<br>(1.87)   | 0.002<br>(0.12)    |
| <i>News Articles<sub>i,t</sub></i>           | 0.008***<br>(8.52)   | 0.020***<br>(6.46)               | 0.015***<br>(6.62)   | 0.011***<br>(3.46)   | 0.010***<br>(4.00)   | 0.006***<br>(2.84)   | 0.006**<br>(2.14)  | 0.005***<br>(2.72) | 0.001<br>(1.08)     | 0.010<br>(0.75)     | -0.002<br>(-1.26)  |
| <i>Abs Return<sub>i,t</sub></i>              | 2.054***<br>(9.11)   | 4.106***<br>(5.12)               | 4.732***<br>(5.41)   | 3.633***<br>(5.15)   | 2.866***<br>(3.68)   | 0.965*<br>(1.75)     | 1.484***<br>(2.88) | 0.212<br>(0.50)    | 0.714**<br>(2.01)   | -0.329<br>(-1.12)   | -0.067<br>(-0.20)  |
| <i>MVE<sub>i,q</sub></i>                     | 0.001<br>(1.01)      | 0.003<br>(0.73)                  | -0.002<br>(-0.30)    | -0.003<br>(-0.69)    | -0.004<br>(-0.91)    | -0.001<br>(-0.48)    | -0.002<br>(-0.42)  | -0.001<br>(-0.62)  | 0.003<br>(0.84)     | -0.002<br>(-0.64)   | 0.000<br>(0.32)    |
| <i>Trading Volume<sub>i,t</sub></i>          | -0.022***<br>(-7.24) | -0.036**<br>(-2.61)              | -0.047***<br>(-3.51) | -0.047***<br>(-5.32) | -0.039***<br>(-4.62) | -0.021***<br>(-2.82) | -0.020<br>(-1.63)  | -0.006<br>(-0.85)  | -0.004<br>(-0.43)   | -0.011<br>(-1.20)   | -0.011*<br>(-1.87) |
| <i>Spread<sub>i,t</sub></i>                  | 3.441***<br>(9.69)   | 8.782***<br>(5.53)               | 6.615***<br>(6.48)   | 6.546***<br>(5.25)   | 4.940***<br>(4.99)   | 1.911***<br>(2.75)   | 1.222<br>(1.40)    | 1.814**<br>(2.44)  | -0.228<br>(-0.46)   | 0.864<br>(1.30)     | 0.411<br>(1.19)    |
| <i>Fourth Qtr<sub>i,t</sub></i>              | -0.027**<br>(-2.20)  | -0.095**<br>(-2.42)              | -0.016<br>(-0.42)    | -0.011<br>(-0.45)    | -0.032<br>(-0.64)    | -0.011<br>(-0.45)    | -0.008<br>(-0.25)  | 0.029<br>(1.67)    | 0.000<br>(0.004)    | -0.116**<br>(-2.18) | -0.020<br>(-0.63)  |
| <i>Total EAs<sub>t</sub></i>                 | -0.004***<br>(-4.68) | -0.007*<br>(-1.85)               | -0.012***<br>(-3.51) | -0.013***<br>(-3.57) | -0.008**<br>(-2.20)  | -0.003<br>(-0.99)    | -0.001<br>(-0.32)  | -0.001<br>(-0.44)  | 0.001<br>(0.43)     | -0.002<br>(-1.06)   | -0.001*<br>(-1.81) |
| <i>Analyst Following<sub>i,t</sub></i>       | -0.006<br>(-1.15)    | -0.042<br>(-1.39)                | -0.017<br>(-0.72)    | -0.008<br>(-0.26)    | 0.013<br>(1.06)      | 0.011<br>(1.02)      | 0.011<br>(0.66)    | -0.007<br>(-0.54)  | -0.017<br>(-1.38)   | -0.022<br>(-1.67)   | 0.000<br>(0.02)    |
| <i>Institutional Ownership<sub>i,q</sub></i> | 0.022<br>(1.49)      | 0.059<br>(0.80)                  | 0.091<br>(1.54)      | -0.073<br>(-1.27)    | -0.039<br>(-0.67)    | 0.127**<br>(2.11)    | 0.042<br>(0.98)    | -0.017<br>(-0.28)  | -0.024<br>(-0.91)   | -0.020<br>(-0.69)   | 0.015<br>(0.75)    |
| <i>BTM<sub>i,q</sub></i>                     | -0.002**<br>(-2.42)  | -0.006<br>(-1.54)                | 0.001<br>(0.39)      | -0.007***<br>(-2.88) | -0.001<br>(-0.29)    | 0.001<br>(0.48)      | 0.003<br>(1.36)    | -0.001<br>(-0.63)  | -0.004**<br>(-2.17) | -0.000<br>(-0.12)   | 0.001<br>(1.20)    |
| Constant                                     | -0.006<br>(-0.27)    | 0.023<br>(0.24)                  | -0.031<br>(-0.31)    | 0.139<br>(1.59)      | 0.033<br>(0.51)      | -0.118<br>(-1.39)    | -0.057<br>(-1.03)  | 0.021<br>(0.43)    | 0.081*<br>(1.86)    | 0.133***<br>(2.99)  | 0.005<br>(0.27)    |
| Year-Week FE                                 | Included             | Included                         | Included             | Included             | Included             | Included             | Included           | Included           | Included            | Included            | Included           |
| N                                            | 245,015              | 24,970                           | 24,048               | 24,549               | 24,548               | 25,050               | 24,283             | 24,549             | 24,048              | 24,922              | 24,048             |
| Adjusted R-squared                           | 0.025                | 0.063                            | 0.066                | 0.063                | 0.044                | 0.017                | 0.024              | 0.021              | 0.021               | 0.032               | 0.016              |

### **SM3 – Additional Specifications of Table 4**

This table presents the  $\gamma_1$  coefficient from estimating alternative versions of Equation (9) Untabulated controls include: *News Articles, Abs Return, MVE, Analyst Following, Trading Volume, Spread, Fourth Qtr, Total EAs, Inst Own, BTM*, and *Year-Week* fixed effects. The dependent variable is *SVI, ASVI, or ASVI2*. Variable definitions are provided in Appendix A and t-statistics are in parentheses. Standard errors are clustered by firm. \*, \*\*, \*\*\* indicates statistical significance at the  $p < 0.10, 0.05, 0.01$  level, respectively.

Panel A excludes one- and two-letter tickers and the “ambiguous” tickers listed in the header of Table 3. Panel B repeats Panel A but excludes 10 additional ambiguous tickers that were added to the S&P 500 after DRT’s sample period: *AMG, CERN, DAL, FOX, LEG, LUV, MAC, O, SIG, V*. Panel C includes only tickers for which a Google search produces a market summary box, as indicated in Table SM1 of our Supplementary Materials. Panel D tabulates results that include untabulated firm fixed effects.

*Panel A: With controls and week fixed effects, and dropping “ambiguous” tickers listed in Table 3 and one-letter and two-letter tickers*

|                             | <b>Pooled</b>       | <b>By Decile of Noise Search</b> |                     |                     |                     |                    |                    |                  |                    |                  |                   |
|-----------------------------|---------------------|----------------------------------|---------------------|---------------------|---------------------|--------------------|--------------------|------------------|--------------------|------------------|-------------------|
|                             |                     | <b>1 [Low]</b>                   | <b>2</b>            | <b>3</b>            | <b>4</b>            | <b>5</b>           | <b>6</b>           | <b>7</b>         | <b>8</b>           | <b>9</b>         | <b>10 [High]</b>  |
| Observations                | 205,702             | 24,469                           | 23,547              | 23,547              | 22,544              | 19,539             | 19,539             | 19,539           | 18,036             | 17,908           | 17,034            |
| Average Noise Search        | 0.655               | 0.176                            | 0.311               | 0.431               | 0.572               | 0.730              | 0.830              | 0.908            | 0.959              | 0.985            | 0.997             |
| $\gamma_1$ for <i>SVI</i>   | 9.958***<br>(8.91)  | 12.400***<br>(6.49)              | 19.060***<br>(7.59) | 17.500***<br>(5.33) | 11.850***<br>(5.21) | 4.863***<br>(3.22) | 5.933**<br>(2.29)  | 0.150<br>(0.05)  | 7.331***<br>(2.87) | 0.997<br>(0.47)  | 3.122<br>(1.54)   |
| Adjusted R-squared          | 0.026               | 0.142                            | 0.123               | 0.101               | 0.101               | 0.063              | 0.132              | 0.071            | 0.188              | 0.085            | 0.193             |
| $\gamma_1$ for <i>ASVI</i>  | 0.547***<br>(13.20) | 1.855***<br>(6.05)               | 1.946***<br>(6.04)  | 1.547***<br>(4.95)  | 0.785***<br>(4.85)  | 0.251<br>(1.45)    | -0.038<br>(-0.15)  | 0.198*<br>(1.78) | 0.108<br>(1.06)    | 0.057*<br>(1.76) | -0.002<br>(-0.11) |
| Adjusted R-squared          | 0.044               | 0.080                            | 0.086               | 0.067               | 0.046               | 0.018              | 0.022              | 0.032            | 0.010              | 0.034            | 0.011             |
| $\gamma_1$ for <i>ASVI2</i> | 0.345***<br>(13.69) | 0.706***<br>(9.18)               | 0.775***<br>(9.44)  | 0.673***<br>(7.45)  | 0.408***<br>(6.57)  | 0.257***<br>(3.87) | 0.177***<br>(3.66) | 0.081<br>(1.58)  | 0.118***<br>(2.75) | 0.045<br>(1.63)  | 0.001<br>(0.03)   |
| Adjusted R-squared          | 0.030               | 0.065                            | 0.067               | 0.065               | 0.047               | 0.021              | 0.029              | 0.025            | 0.025              | 0.040            | 0.020             |

*Panel B: With controls and week fixed effects, and dropping an updated list of “ambiguous” tickers and one-letter and two-letter tickers*

|                             | <b>Pooled</b>       | <b>By Decile of Noise Search</b> |                     |                     |                     |                    |                    |                  |                    |                  |                   |
|-----------------------------|---------------------|----------------------------------|---------------------|---------------------|---------------------|--------------------|--------------------|------------------|--------------------|------------------|-------------------|
|                             |                     | <b>1 [Low]</b>                   | <b>2</b>            | <b>3</b>            | <b>4</b>            | <b>5</b>           | <b>6</b>           | <b>7</b>         | <b>8</b>           | <b>9</b>         | <b>10 [High]</b>  |
| Observations                | 201,694             | 24,469                           | 23,547              | 23,046              | 22,544              | 19,038             | 19,539             | 19,038           | 18,036             | 17,407           | 15,030            |
| Average Noise Search        | 0.689               | 0.177                            | 0.311               | 0.432               | 0.574               | 0.729              | 0.827              | 0.912            | 0.960              | 0.985            | 0.997             |
| $\gamma_1$ for <i>SVI</i>   | 10.16***<br>(8.93)  | 12.40***<br>(6.48)               | 19.060***<br>(7.59) | 17.930***<br>(5.39) | 11.850***<br>(5.20) | 5.129***<br>(3.45) | 5.933**<br>(2.29)  | 0.841<br>(0.30)  | 7.331***<br>(2.87) | 1.031<br>(0.47)  | 1.915<br>(0.79)   |
| Adjusted R-squared          | 0.026               | 0.142                            | 0.123               | 0.104               | 0.101               | 0.043              | 0.132              | 0.082            | 0.188              | 0.091            | 0.199             |
| $\gamma_1$ for <i>ASVI</i>  | 0.557***<br>(13.19) | 1.855***<br>(6.07)               | 1.946***<br>(6.03)  | 1.587***<br>(5.01)  | 0.785***<br>(4.84)  | 0.252<br>(1.43)    | -0.038<br>(-0.15)  | 0.201*<br>(1.77) | 0.108<br>(1.05)    | 0.062*<br>(1.88) | -0.002<br>(-0.11) |
| Adjusted R-squared          | 0.030               | 0.065                            | 0.067               | 0.066               | 0.047               | 0.021              | 0.029              | 0.025            | 0.025              | 0.043            | 0.027             |
| $\gamma_1$ for <i>ASVI2</i> | 0.349***<br>(13.64) | 0.706***<br>(9.13)               | 0.775***<br>(9.43)  | 0.690***<br>(7.57)  | 0.408***<br>(6.571) | 0.257***<br>(3.76) | 0.177***<br>(3.66) | 0.082<br>(1.56)  | 0.118***<br>(2.74) | 0.046<br>(1.62)  | -0.003<br>(-0.14) |
| Adjusted R-squared          | 0.027               | 0.065                            | 0.066               | 0.065               | 0.045               | 0.018              | 0.024              | 0.022            | 0.022              | 0.035            | 0.022             |

*Panel C: With controls and week fixed effects, and keeping only tickers for which Google brings up a stock price information box*

|                             | <b>Pooled</b>       | <b>By Decile of Noise Search</b> |                     |                     |                     |                     |                    |                  |                    |                    |                   |
|-----------------------------|---------------------|----------------------------------|---------------------|---------------------|---------------------|---------------------|--------------------|------------------|--------------------|--------------------|-------------------|
|                             |                     | <b>1 [Low]</b>                   | <b>2</b>            | <b>3</b>            | <b>4</b>            | <b>5</b>            | <b>6</b>           | <b>7</b>         | <b>8</b>           | <b>9</b>           | <b>10 [High]</b>  |
| Observations                | 152,303             | 22,044                           | 22,545              | 23,046              | 23,546              | 17,535              | 15,531             | 11,022           | 7,515              | 6,513              | 3,006             |
| Average Noise Search        | 0.568               | 0.176                            | 0.310               | 0.432               | 0.573               | 0.730               | 0.826              | 0.902            | 0.960              | 0.985              | 0.997             |
| $\gamma_1$ for <i>SVI</i>   | 12.41***<br>(8.87)  | 12.74***<br>(6.477)              | 20.08***<br>(7.944) | 16.05***<br>(4.272) | 12.58***<br>(5.575) | 7.249***<br>(4.229) | 6.473**<br>(2.159) | 1.740<br>(0.531) | 6.212**<br>(2.173) | -0.760<br>(-0.296) | 3.154<br>(1.642)  |
| Adjusted R-squared          | 0.052               | 0.155                            | 0.106               | 0.157               | 0.081               | 0.137               | 0.213              | 0.106            | 0.397              | 0.612              | 0.624             |
| $\gamma_1$ for <i>ASVI</i>  | 0.706***<br>(13.36) | 1.151***<br>(8.69)               | 1.358***<br>(8.77)  | 1.164***<br>(8.02)  | 0.621***<br>(6.26)  | 0.303***<br>(2.93)  | 0.255***<br>(3.59) | 0.138<br>(1.23)  | 0.140<br>(1.71)    | -0.004<br>(-0.09)  | -0.033<br>(-0.89) |
| Adjusted R-squared          | 0.055               | 0.093                            | 0.118               | 0.108               | 0.072               | 0.023               | 0.036              | 0.039            | 0.030              | 0.102              | 0.078             |
| $\gamma_1$ for <i>ASVI2</i> | 0.441***<br>(13.85) | 0.744***<br>(9.36)               | 0.791***<br>(9.35)  | 0.716***<br>(8.44)  | 0.393***<br>(6.44)  | 0.249***<br>(3.34)  | 0.179***<br>(3.66) | 0.048<br>(0.58)  | 0.112<br>(1.54)    | -0.0059<br>(-0.13) | -0.029<br>(-0.86) |
| Adjusted R-squared          | 0.034               | 0.066                            | 0.068               | 0.067               | 0.046               | 0.017               | 0.027              | 0.025            | 0.024              | 0.105              | 0.064             |

*Panel D: With controls and week fixed effects, and adding firm fixed effects*

|                             | <b>Pooled</b>       | <b>By Decile of Noise Search</b> |                     |                     |                    |                    |                    |                   |                    |                 |                   |
|-----------------------------|---------------------|----------------------------------|---------------------|---------------------|--------------------|--------------------|--------------------|-------------------|--------------------|-----------------|-------------------|
|                             |                     | <b>1 [Low]</b>                   | <b>2</b>            | <b>3</b>            | <b>4</b>           | <b>5</b>           | <b>6</b>           | <b>7</b>          | <b>8</b>           | <b>9</b>        | <b>10 [High]</b>  |
| Observations                | 245,015             | 24,970                           | 24,048              | 24,549              | 24,548             | 25,050             | 24,283             | 24,549            | 24,048             | 24,922          | 24,048            |
| Average Noise Search        | 0.689               | 0.177                            | 0.311               | 0.432               | 0.574              | 0.729              | 0.827              | 0.912             | 0.960              | 0.985           | 0.997             |
| $\gamma_1$ for <i>SVI</i>   | 6.925***<br>(13.04) | 12.850***<br>(7.73)              | 17.790***<br>(9.71) | 15.570***<br>(7.24) | 9.994***<br>(6.17) | 4.375***<br>(4.05) | 4.393***<br>(3.17) | 2.550*<br>(1.94)  | 3.188***<br>(3.27) | 0.820<br>(1.33) | 0.071<br>(0.094)  |
| Adjusted R-squared          | 0.700               | 0.396                            | 0.476               | 0.550               | 0.622              | 0.643              | 0.643              | 0.670             | 0.731              | 0.738           | 0.680             |
| $\gamma_1$ for <i>ASVI</i>  | 0.438***<br>(12.74) | 1.123***<br>(8.77)               | 1.247***<br>(8.29)  | 1.011***<br>(7.46)  | 0.573***<br>(6.28) | 0.203***<br>(2.88) | 0.185***<br>(3.33) | 0.117**<br>(2.09) | 0.059<br>(1.42)    | 0.028<br>(1.40) | -0.007<br>(-0.54) |
| Adjusted R-squared          | 0.040               | 0.077                            | 0.104               | 0.097               | 0.052              | 0.026              | 0.025              | 0.019             | 0.016              | 0.023           | 0.011             |
| $\gamma_1$ for <i>ASVI2</i> | 0.270***<br>(12.78) | 0.719***<br>(9.41)               | 0.721***<br>(8.44)  | 0.623***<br>(7.89)  | 0.353***<br>(6.31) | 0.154***<br>(3.09) | 0.114***<br>(3.02) | 0.063<br>(1.54)   | 0.052<br>(1.62)    | 0.030<br>(1.38) | -0.005<br>(-0.34) |
| Adjusted R-squared          | 0.022               | 0.049                            | 0.054               | 0.054               | 0.028              | 0.012              | 0.013              | 0.011             | 0.011              | 0.016           | 0.006             |

## **SM4 – Simulation Results of Induced Increase in Ticker Search on Random Days**

A weakness with the analyses in Table 4 is that it is possible that true *Investor\_Search* around earnings announcements is lower for firms that have higher *Noise\_Search*, in which case it is impossible to isolate the effects of measurement error. We address this concern using simulations in which we induce specified increases in *Investor\_Search* around random dates. Our procedures are as follows:

- 1) Drop all EA days and replace each with a randomly selected non-EA day (*Random\_Day*).
- 2) Induce a specific amount of *Investor\_Search* on each *Random\_Day*. For example, the ticker UNM has *Noise\_Search* of 99.2%, so inducing a 100% increase in *Investor\_Search* increases SVI by 0.8. For a ticker with 0% *Noise\_Search*, inducing a 100% increase in *Investor\_Search* increases SVI by 100.<sup>1</sup> Calculate ASVI and ASVI2 using the updated data.
- 3) Estimate model (8) where *Random\_Day* replaces EA to see whether the model rejects the null that the *Random\_Day* coefficient is equal to zero at a 5 percent level of confidence (two-tailed).
- 4) Repeat this process 1,000 times, selecting *Random\_Day* with replacement.

Panels A through C below summarize the simulation results for SVI, ASVI, and ASVI2. For each simulation of 1,000 trials, we report the average  $\gamma_1$  estimate and percent of trials that reject the null that there is no difference in search. The rows have induced increases in *Investor\_Search* ranging from 5% to 500%. The shaded cells reject the null in at least 50 percent of trials. Controls and fixed effects are untabulated. Standard errors are clustered by firm.

Starting with 5% inducement for SVI in Panel A, column (i) finds an average pooled coefficient of 0.410. In total 41.9% of trials reject the null hypothesis, indicating that a pooled sample of roughly 245,000 observations is unlikely to identify a 5% increase in *Investor\_Search*. Looking at columns (ii) through (xi) in Panel A, the  $\gamma_1$  estimates and t-statistics tend to decline as *Noise\_Search* increases. However, coefficient estimates are not reliably significant even in the lowest deciles of *Noise\_Search*, primarily due to the reduction in sample size relative to column (i). These results indicate that samples of roughly 24,500 are unlikely to identify 5% increases in *Investor\_Search* even among firms with the least *Noise\_Search*.

The lower rows in Panel A show that rejection rates improve as the induced increase in *Investor\_Search* grows. At 10%, the pooled model identifies an increase in SVI in 94.0% of trials. However, the deciles continue to perform poorly, especially those higher in *Noise\_Search*. Even with a 500% inducement in *Investor\_Search* in the bottom row of Panel A, only 18.9% of trials reject the null in the highest decile of *Noise\_Search*. Panels B and C show that ASVI and ASVI2 generally perform even worse than SVI in rejecting the null hypothesis.

The important takeaway from this section is to confirm that *Noise\_Search* causes attenuated coefficient estimates, even when we are sure that increases in true *Investor\_Search* are the same for all firms.

---

<sup>1</sup> As discussed, Google scales SVI from 0 to 100 within each ticker. To maintain consistency between our induced search and true SVI, we also rescale SVI from 0 to 100 after inducing *Investor\_Search*. That said, untabulated results produce larger coefficients but highly similar rejection rates if we do not rescale SVI.

*Panel A: SVI*

|                         |                  | (i)           | (ii)                                     | (iii)    | (iv)     | (v)      | (vi)     | (vii)    | (viii)   | (ix)     | (x)      | (xi)             |
|-------------------------|------------------|---------------|------------------------------------------|----------|----------|----------|----------|----------|----------|----------|----------|------------------|
|                         |                  | <b>Pooled</b> | <b>Decile Partitions on Noise Search</b> |          |          |          |          |          |          |          |          |                  |
| <b>Induced Increase</b> |                  |               | <b>1 [Low]</b>                           | <b>2</b> | <b>3</b> | <b>4</b> | <b>5</b> | <b>6</b> | <b>7</b> | <b>8</b> | <b>9</b> | <b>10 [High]</b> |
| <b>5%</b>               | Avg. coefficient | 0.410         | 0.627                                    | 0.682    | 0.684    | 0.682    | 0.489    | 0.399    | 0.236    | 0.043    | 0.001    | 0.020            |
|                         | rejected at 5%   | 41.9%         | 14.6%                                    | 14.4%    | 15.6%    | 13.8%    | 9.0%     | 8.8%     | 6.0%     | 3.7%     | 2.4%     | 2.6%             |
| <b>10%</b>              | Avg. coefficient | 0.801         | 1.262                                    | 1.413    | 1.352    | 1.360    | 1.005    | 0.759    | 0.421    | 0.129    | 0.034    | 0.028            |
|                         | rejected at 5%   | 94.0%         | 42.4%                                    | 48.4%    | 45.8%    | 40.6%    | 21.3%    | 17.6%    | 9.3%     | 5.0%     | 2.6%     | 2.7%             |
| <b>15%</b>              | Avg. coefficient | 1.191         | 1.894                                    | 2.141    | 2.019    | 2.036    | 1.519    | 1.119    | 0.606    | 0.215    | 0.069    | 0.036            |
|                         | rejected at 5.0% | 99.9%         | 76.9%                                    | 80.7%    | 79.2%    | 73.3%    | 44.4%    | 30.1%    | 13.8%    | 6.2%     | 3.1%     | 2.7%             |
| <b>20%</b>              | Avg. coefficient | 1.579         | 2.524                                    | 2.865    | 2.683    | 2.709    | 2.032    | 1.478    | 0.791    | 0.301    | 0.104    | 0.044            |
|                         | rejected at 5.0% | 100.0%        | 92.5%                                    | 95.7%    | 94.4%    | 91.1%    | 68.7%    | 45.8%    | 20.4%    | 7.0%     | 3.2%     | 2.9%             |
| <b>25%</b>              | Avg. coefficient | 1.966         | 3.150                                    | 3.587    | 3.345    | 3.379    | 2.543    | 1.837    | 0.975    | 0.387    | 0.139    | 0.052            |
|                         | rejected at 5.0% | 100.0%        | 99.1%                                    | 99.8%    | 99.3%    | 98.7%    | 86.3%    | 64.1%    | 27.6%    | 8.9%     | 3.8%     | 2.9%             |
| <b>50%</b>              | Avg. coefficient | 3.868         | 6.22                                     | 7.122    | 6.573    | 6.66     | 5.061    | 3.623    | 1.898    | 0.816    | 0.313    | 0.092            |
|                         | rejected at 5.0% | 100.0%        | 100.0%                                   | 100.0%   | 100.0%   | 100.0%   | 100.0%   | 99.6%    | 73.0%    | 20.9%    | 7.0%     | 2.9%             |
| <b>100%</b>             | Avg. coefficient | 7.399         | 11.840                                   | 13.547   | 12.454   | 12.618   | 9.819    | 7.103    | 3.732    | 1.673    | 0.662    | 0.172            |
|                         | rejected at 5.0% | 100.0%        | 100.0%                                   | 100.0%   | 100.0%   | 100.0%   | 100.0%   | 100.0%   | 99.9%    | 61.1%    | 17.4%    | 4.1%             |
| <b>200%</b>             | Avg. coefficient | 13.088        | 20.304                                   | 23.067   | 21.632   | 21.777   | 17.840   | 13.389   | 7.329    | 3.380    | 1.359    | 0.333            |
|                         | rejected at 5.0% | 100.0%        | 100.0%                                   | 100.0%   | 100.0%   | 100.0%   | 100.0%   | 100.0%   | 100.0%   | 99.3%    | 46.3%    | 5.8%             |
| <b>300%</b>             | Avg. coefficient | 17.262        | 25.756                                   | 29.312   | 27.913   | 28.17    | 23.983   | 18.568   | 10.763   | 5.07     | 2.053    | 0.493            |
|                         | rejected at 5.0% | 100.0%        | 100.0%                                   | 100.0%   | 100.0%   | 100.0%   | 100.0%   | 100.0%   | 100.0%   | 100.0%   | 79.4%    | 9.0%             |
| <b>500%</b>             | Avg. coefficient | 22.843        | 31.858                                   | 36.334   | 35.330   | 36.194   | 32.336   | 26.294   | 16.879   | 8.352    | 3.428    | 0.812            |
|                         | rejected at 5.0% | 100.0%        | 100.0%                                   | 100.0%   | 100.0%   | 100.0%   | 100.0%   | 100.0%   | 100.0%   | 100.0%   | 99.5%    | 18.9%            |

*Panel B: ASVI*

|                         |                  | (i)           | (ii)                                     | (iii)    | (iv)     | (v)      | (vi)     | (vii)    | (viii)   | (ix)     | (x)      | (xi)             |
|-------------------------|------------------|---------------|------------------------------------------|----------|----------|----------|----------|----------|----------|----------|----------|------------------|
|                         |                  | <b>Pooled</b> | <b>Decile Partitions on Noise Search</b> |          |          |          |          |          |          |          |          |                  |
| <b>Induced Increase</b> |                  |               | <b>1 [Low]</b>                           | <b>2</b> | <b>3</b> | <b>4</b> | <b>5</b> | <b>6</b> | <b>7</b> | <b>8</b> | <b>9</b> | <b>10 [High]</b> |
| <b>5%</b>               | Avg. coefficient | 0.018         | 0.058                                    | 0.038    | 0.027    | 0.030    | 0.017    | -0.005   | 0.008    | -0.001   | 0.002    | 0.001            |
|                         | rejected at 5%   | 3.9%          | 6.0%                                     | 3.9%     | 2.4%     | 3.4%     | 0.8%     | 0.3%     | 1.8%     | 0.3%     | 1.3%     | 0.5%             |
| <b>10%</b>              | Avg. coefficient | 0.039         | 0.119                                    | 0.083    | 0.067    | 0.055    | 0.035    | 0.021    | 0.013    | -0.002   | 0.002    | 0.001            |
|                         | rejected at 5%   | 20.7%         | 12.8%                                    | 14.2%    | 7.5%     | 7.8%     | 3.9%     | 0.1%     | 2.8%     | 0.1%     | 0.8%     | 0.8%             |
| <b>15%</b>              | Avg. coefficient | 0.059         | 0.177                                    | 0.127    | 0.101    | 0.082    | 0.052    | 0.031    | 0.018    | 0.001    | 0.003    | 0.001            |
|                         | rejected at 5.0% | 55.0%         | 27.1%                                    | 35.2%    | 19.6%    | 16.7%    | 7.6%     | 0.2%     | 4.1%     | 0.1%     | 0.8%     | 0.8%             |
| <b>20%</b>              | Avg. coefficient | 0.079         | 0.234                                    | 0.17     | 0.134    | 0.108    | 0.069    | 0.041    | 0.023    | 0.003    | 0.004    | 0.001            |
|                         | rejected at 5.0% | 85.7%         | 43.0%                                    | 58.5%    | 38.3%    | 32.4%    | 13.1%    | 0.2%     | 5.4%     | 0.1%     | 0.8%     | 0.9%             |
| <b>25%</b>              | Avg. coefficient | 0.098         | 0.291                                    | 0.213    | 0.167    | 0.135    | 0.085    | 0.051    | 0.028    | 0.005    | 0.005    | 0.001            |
|                         | rejected at 5.0% | 96.3%         | 62.1%                                    | 77.7%    | 55.9%    | 49.8%    | 22.6%    | 0.5%     | 7.2%     | 0.1%     | 0.9%     | 1.0%             |
| <b>50%</b>              | Avg. coefficient | 0.193         | 0.566                                    | 0.427    | 0.324    | 0.268    | 0.167    | 0.085    | 0.053    | 0.017    | 0.011    | 0.002            |
|                         | rejected at 5.0% | 99.7%         | 98.1%                                    | 99.7%    | 98.1%    | 97.3%    | 75.5%    | 4.9%     | 22.8%    | 0.3%     | 1.9%     | 1.1%             |
| <b>100%</b>             | Avg. coefficient | 0.377         | 1.092                                    | 0.822    | 0.642    | 0.513    | 0.329    | 0.196    | 0.104    | 0.041    | 0.02     | 0.004            |
|                         | rejected at 5.0% | 100.0%        | 99.3%                                    | 100.0%   | 100.0%   | 100.0%   | 98.9%    | 47.0%    | 70.5%    | 2.1%     | 3.9%     | 1.6%             |
| <b>200%</b>             | Avg. coefficient | 0.684         | 1.928                                    | 1.463    | 1.169    | 0.932    | 0.613    | 0.374    | 0.203    | 0.089    | 0.039    | 0.007            |
|                         | rejected at 5.0% | 100.0%        | 100.0%                                   | 100.0%   | 100.0%   | 100.0%   | 100.0%   | 92.4%    | 98.8%    | 11.9%    | 15.0%    | 2.7%             |
| <b>300%</b>             | Avg. coefficient | 0.916         | 2.519                                    | 1.92     | 1.57     | 1.255    | 0.844    | 0.528    | 0.300    | 0.136    | 0.059    | 0.01             |
|                         | rejected at 5.0% | 100.0%        | 100.0%                                   | 100.0%   | 100.0%   | 100.0%   | 100.0%   | 95.2%    | 99.8%    | 30.8%    | 34.2%    | 3.7%             |
| <b>500%</b>             | Avg. coefficient | 1.228         | 3.234                                    | 2.469    | 2.084    | 1.693    | 1.179    | 0.773    | 0.478    | 0.228    | 0.097    | 0.016            |
|                         | rejected at 5.0% | 100.0%        | 100.0%                                   | 100.0%   | 100.0%   | 100.0%   | 100.0%   | 96.4%    | 100.0%   | 81.3%    | 75.2%    | 8.0%             |

*Panel C: ASV12*

|                         |                  | (i)           | (ii)                                     | (iii)    | (iv)     | (v)      | (vi)     | (vii)    | (viii)   | (ix)     | (x)      | (xi)             |
|-------------------------|------------------|---------------|------------------------------------------|----------|----------|----------|----------|----------|----------|----------|----------|------------------|
|                         |                  | <b>Pooled</b> | <b>Decile Partitions on Noise Search</b> |          |          |          |          |          |          |          |          |                  |
| <b>Induced Increase</b> |                  |               | <b>1 [Low]</b>                           | <b>2</b> | <b>3</b> | <b>4</b> | <b>5</b> | <b>6</b> | <b>7</b> | <b>8</b> | <b>9</b> | <b>10 [High]</b> |
| <b>5%</b>               | Avg. coefficient | 0.013         | 0.034                                    | 0.027    | 0.024    | 0.018    | 0.012    | 0.007    | 0.006    | 0.002    | 0.002    | 0.000            |
|                         | rejected at 5%   | 22.2%         | 11.9%                                    | 10.4%    | 9.1%     | 7.8%     | 6.9%     | 4.3%     | 4.8%     | 2.9%     | 3.1%     | 2.6%             |
| <b>10%</b>              | Avg. coefficient | 0.026         | 0.064                                    | 0.055    | 0.047    | 0.037    | 0.025    | 0.015    | 0.01     | 0.004    | 0.002    | 0.000            |
|                         | rejected at 5%   | 65.4%         | 24.6%                                    | 25.7%    | 22.6%    | 17.4%    | 12.3%    | 9.3%     | 6.9%     | 3.8%     | 3.1%     | 2.4%             |
| <b>15%</b>              | Avg. coefficient | 0.038         | 0.092                                    | 0.082    | 0.071    | 0.055    | 0.036    | 0.023    | 0.014    | 0.005    | 0.003    | 0.001            |
|                         | rejected at 5.0% | 92.5%         | 41.9%                                    | 46.8%    | 44.5%    | 29.9%    | 19.7%    | 14.5%    | 9.5%     | 5.2%     | 3.8%     | 2.8%             |
| <b>20%</b>              | Avg. coefficient | 0.050         | 0.119                                    | 0.108    | 0.093    | 0.072    | 0.048    | 0.031    | 0.018    | 0.007    | 0.004    | 0.001            |
|                         | rejected at 5.0% | 99.3%         | 60.9%                                    | 66.5%    | 64.1%    | 45.0%    | 29.4%    | 20.5%    | 13.2%    | 6.1%     | 3.9%     | 2.9%             |
| <b>25%</b>              | Avg. coefficient | 0.062         | 0.146                                    | 0.134    | 0.113    | 0.09     | 0.059    | 0.037    | 0.023    | 0.01     | 0.004    | 0.001            |
|                         | rejected at 5.0% | 100.0%        | 76.6%                                    | 79.1%    | 78.2%    | 60.3%    | 40.6%    | 28.2%    | 17.6%    | 6.0%     | 4.0%     | 2.3%             |
| <b>50%</b>              | Avg. coefficient | 0.117         | 0.268                                    | 0.252    | 0.215    | 0.172    | 0.115    | 0.073    | 0.042    | 0.019    | 0.007    | 0.002            |
|                         | rejected at 5.0% | 100.0%        | 99.4%                                    | 100.0%   | 99.2%    | 98.5%    | 82.2%    | 64.8%    | 40.8%    | 14.9%    | 5.1%     | 3.1%             |
| <b>100%</b>             | Avg. coefficient | 0.213         | 0.465                                    | 0.449    | 0.393    | 0.316    | 0.218    | 0.146    | 0.081    | 0.036    | 0.015    | 0.003            |
|                         | rejected at 5.0% | 100.0%        | 100.0%                                   | 100.0%   | 100.0%   | 100.0%   | 99.8%    | 99.0%    | 85.0%    | 39.5%    | 14.7%    | 3.9%             |
| <b>200%</b>             | Avg. coefficient | 0.365         | 0.753                                    | 0.744    | 0.665    | 0.549    | 0.394    | 0.273    | 0.154    | 0.071    | 0.029    | 0.006            |
|                         | rejected at 5.0% | 100.0%        | 100.0%                                   | 100.0%   | 100.0%   | 100.0%   | 100.0%   | 100.0%   | 100.0%   | 83.9%    | 34.7%    | 5.6%             |
| <b>300%</b>             | Avg. coefficient | 0.484         | 0.962                                    | 0.962    | 0.868    | 0.735    | 0.541    | 0.384    | 0.221    | 0.104    | 0.043    | 0.008            |
|                         | rejected at 5.0% | 100.0%        | 100.0%                                   | 100.0%   | 100.0%   | 100.0%   | 100.0%   | 100.0%   | 100.0%   | 97.2%    | 57.2%    | 7.8%             |
| <b>500%</b>             | Avg. coefficient | 0.666         | 1.248                                    | 1.271    | 1.171    | 1.012    | 0.778    | 0.573    | 0.344    | 0.167    | 0.07     | 0.013            |
|                         | rejected at 5.0% | 100.0%        | 100.0%                                   | 100.0%   | 100.0%   | 100.0%   | 100.0%   | 100.0%   | 100.0%   | 100.0%   | 91.1%    | 16.3%            |

### SM5 – Complete tabulation of Table 7: TS-SVI around EAs, by decile of *TS-Noise Search*, with controls and week fixed effects

This table presents the full results from the analyses in Table 7. Panel A of this table is for TS-SVI, Panel B of this table is for TS-ASVI, and Panel C of this table is for TS-ASVI2. See Table 7 for further details. Variable definitions are provided in Appendix A. T-statistics are in parentheses. Standard errors are clustered by firm. \*, \*\*, \*\*\* indicates statistical significance at the  $p < 0.10, 0.05, 0.01$  level, respectively.

#### *Panel A: TS-SVI*

|                                                      | Pooled                | By Decile of <i>TS-Noise Search</i> |                       |                    |                    |                       |                    |                       |                       |                       |                     |
|------------------------------------------------------|-----------------------|-------------------------------------|-----------------------|--------------------|--------------------|-----------------------|--------------------|-----------------------|-----------------------|-----------------------|---------------------|
|                                                      |                       | 1 [Low]                             | 2                     | 3                  | 4                  | 5                     | 6                  | 7                     | 8                     | 9                     | 10 [High]           |
| $\gamma_1$ for TS-SVI                                | 3.487***<br>(5.52)    | 3.887***<br>(3.34)                  | 2.704*<br>(1.67)      | 2.700*<br>(1.37)   | 1.838<br>(1.12)    | 6.553***<br>(3.53)    | 4.192**<br>(2.12)  | 1.977<br>(1.14)       | 5.323***<br>(3.24)    | 1.914*<br>(1.36)      | 5.221**<br>(2.17)   |
| <i>News Articles</i> <sub><i>i,t</i></sub>           | 0.283***<br>(4.32)    | 0.051<br>(0.74)                     | 0.168<br>(1.05)       | 0.504**<br>(2.44)  | 0.427**<br>(2.04)  | 0.189<br>(1.15)       | 0.303*<br>(1.94)   | 0.640***<br>(3.51)    | 0.017<br>(0.12)       | 0.298**<br>(2.32)     | -0.031<br>(-0.12)   |
| <i>Abs Return</i> <sub><i>i,t</i></sub>              | 42.600***<br>(5.74)   | 31.800*<br>(1.74)                   | 30.650<br>(1.50)      | 44.400*<br>(1.99)  | 28.960<br>(1.44)   | 35.560<br>(1.31)      | 9.205<br>(0.38)    | 32.920**<br>(2.08)    | 80.430***<br>(3.76)   | 45.100***<br>(2.99)   | 65.200***<br>(3.24) |
| <i>MVE</i> <sub><i>i,q</i></sub>                     | 1.407***<br>(8.56)    | 1.265***<br>(3.23)                  | 0.301<br>(0.47)       | 1.879***<br>(4.44) | 1.206**<br>(2.48)  | 1.936***<br>(5.82)    | 1.386***<br>(3.53) | 1.096**<br>(2.55)     | 1.623***<br>(3.56)    | 1.766***<br>(5.19)    | 1.442**<br>(2.28)   |
| <i>Trading Volume</i> <sub><i>i,t</i></sub>          | 2.219***<br>(5.60)    | 2.268*<br>(1.87)                    | -0.263<br>(-0.26)     | 0.936<br>(0.89)    | 0.637<br>(0.45)    | 3.473***<br>(5.18)    | 3.199**<br>(2.41)  | 3.710***<br>(3.09)    | 2.114**<br>(2.32)     | 3.374***<br>(4.11)    | 1.052<br>(0.84)     |
| <i>Spread</i> <sub><i>i,t</i></sub>                  | 3.128<br>(0.15)       | 6.507<br>(0.17)                     | 36.630<br>(0.63)      | 15.690<br>(0.29)   | 37.590<br>(0.70)   | 13.990<br>(0.33)      | 56.890<br>(0.75)   | -19.530<br>(-0.38)    | 9.615<br>(0.22)       | -16.260<br>(-0.47)    | -59.080<br>(-1.09)  |
| <i>Fourth Qtr</i> <sub><i>i,t</i></sub>              | 0.185<br>(0.82)       | -0.683<br>(-1.41)                   | -0.272<br>(-0.58)     | 0.838<br>(1.61)    | 0.943*<br>(1.71)   | 0.901<br>(1.12)       | -0.288<br>(-0.36)  | -0.125<br>(-0.14)     | -0.180<br>(-0.33)     | 0.968**<br>(2.18)     | -0.734<br>(-0.96)   |
| <i>Total EAs</i> <sub><i>t</i></sub>                 | 0.0561**<br>(2.17)    | 0.122<br>(1.45)                     | 0.0094<br>(0.13)      | 0.059<br>(0.67)    | 0.094<br>(1.21)    | 0.067<br>(0.97)       | 0.096<br>(1.21)    | -0.101<br>(-1.18)     | 0.095<br>(1.12)       | 0.072<br>(0.87)       | 0.044<br>(0.51)     |
| <i>Analyst Following</i> <sub><i>i,t</i></sub>       | 0.773<br>(0.84)       | 1.132<br>(0.87)                     | 2.369<br>(1.23)       | -1.458<br>(-0.51)  | 2.416<br>(0.91)    | -3.388**<br>(-2.30)   | 2.742<br>(1.00)    | 1.021<br>(0.58)       | -0.230<br>(-0.09)     | 0.144<br>(0.07)       | 2.920<br>(0.96)     |
| <i>Institutional Ownership</i> <sub><i>i,q</i></sub> | -15.980***<br>(-5.36) | -15.560*<br>(-1.79)                 | -24.490***<br>(-3.13) | -2.259<br>(-0.32)  | -10.350<br>(-1.51) | -26.250***<br>(-5.21) | -2.676<br>(-0.16)  | -29.210***<br>(-3.18) | -27.960***<br>(-3.87) | -16.420***<br>(-3.27) | -15.000*<br>(-1.94) |
| <i>BTM</i> <sub><i>i,q</i></sub>                     | 0.011<br>(0.09)       | -0.137<br>(-0.40)                   | -0.336<br>(-0.86)     | 0.448<br>(1.13)    | 0.006<br>(0.02)    | -0.270<br>(-0.85)     | -0.438<br>(-0.89)  | -0.604*<br>(-1.94)    | 0.395<br>(1.14)       | 0.510**<br>(2.17)     | 0.483<br>(0.95)     |
| Constant                                             | 9.054**<br>(2.22)     | 8.735<br>(0.93)                     | 23.370**<br>(2.21)    | 0.647<br>(0.06)    | 1.459<br>(0.12)    | 26.220***<br>(3.54)   | -7.024<br>(-0.40)  | 22.500**<br>(2.56)    | 21.110**<br>(2.08)    | 3.740<br>(0.49)       | 2.319<br>(0.28)     |
| Year-Week FE                                         | Included              | Included                            | Included              | Included           | Included           | Included              | Included           | Included              | Included              | Included              | Included            |
| Observations                                         | 245,015               | 24,549                              | 24,549                | 24,548             | 24,784             | 24,549                | 24,048             | 24,970                | 24,047                | 24,549                | 24,422              |
| Adjusted R-squared                                   | 0.078                 | 0.049                               | 0.052                 | 0.087              | 0.094              | 0.138                 | 0.063              | 0.144                 | 0.077                 | 0.110                 | 0.074               |

*Panel B: TS-ASVI*

|                                                      | <b>Pooled</b>         | <b>By Decile of TS-Noise Search</b> |                      |                      |                      |                      |                      |                      |                      |                      |                      |
|------------------------------------------------------|-----------------------|-------------------------------------|----------------------|----------------------|----------------------|----------------------|----------------------|----------------------|----------------------|----------------------|----------------------|
|                                                      |                       | <b>1 [Low]</b>                      | <b>2</b>             | <b>3</b>             | <b>4</b>             | <b>5</b>             | <b>6</b>             | <b>7</b>             | <b>8</b>             | <b>9</b>             | <b>10 [High]</b>     |
| $\gamma_1$ for TS-ASVI                               | 0.928***<br>(10.24)   | 1.080***<br>(2.89)                  | 0.745***<br>(2.80)   | 0.666***<br>(2.88)   | 0.690***<br>(3.47)   | 0.940***<br>(3.31)   | 1.218***<br>(4.49)   | 1.045***<br>(3.55)   | 1.015***<br>(3.49)   | 0.812**<br>(2.36)    | 0.925***<br>(3.05)   |
| <i>News Articles</i> <sub><i>i,t</i></sub>           | 0.005<br>(1.57)       | 0.014<br>(0.90)                     | 0.011<br>(1.25)      | 0.017<br>(1.58)      | -0.001<br>(-0.13)    | 0.005<br>(0.68)      | -0.005<br>(-0.68)    | -0.004<br>(-0.38)    | 0.001<br>(0.14)      | 0.011<br>(0.88)      | 0.009<br>(0.99)      |
| <i>Abs Return</i> <sub><i>i,t</i></sub>              | 5.324***<br>(4.99)    | 6.618<br>(1.66)                     | 4.993<br>(1.52)      | 11.39***<br>(2.71)   | 5.342*<br>(1.84)     | 6.970**<br>(2.17)    | 2.303<br>(0.93)      | 3.111<br>(0.88)      | 0.723<br>(0.25)      | 5.855<br>(1.63)      | 6.165<br>(1.52)      |
| <i>MVE</i> <sub><i>i,q</i></sub>                     | -0.062***<br>(-11.79) | -0.046***<br>(-3.01)                | -0.055***<br>(-3.22) | -0.105***<br>(-8.12) | -0.072***<br>(-3.81) | -0.063***<br>(-5.55) | -0.071***<br>(-5.21) | -0.065***<br>(-4.49) | -0.058***<br>(-3.91) | -0.044**<br>(-2.59)  | -0.055***<br>(-3.02) |
| <i>Trading Volume</i> <sub><i>i,t</i></sub>          | -0.156***<br>(-13.00) | -0.134***<br>(-2.96)                | -0.149***<br>(-3.26) | -0.157***<br>(-4.57) | -0.167***<br>(-3.28) | -0.118***<br>(-4.15) | -0.163***<br>(-3.92) | -0.230***<br>(-6.52) | -0.170***<br>(-6.43) | -0.177***<br>(-4.21) | -0.152***<br>(-3.93) |
| <i>Spread</i> <sub><i>i,t</i></sub>                  | 5.036***<br>(4.02)    | 2.168<br>(0.57)                     | 4.926<br>(1.07)      | 0.914<br>(0.28)      | 1.971<br>(0.66)      | 3.870<br>(1.03)      | 4.545<br>(1.48)      | 8.967*<br>(1.79)     | 16.430***<br>(3.80)  | 5.939<br>(1.37)      | 3.430<br>(0.82)      |
| <i>Fourth Qtr</i> <sub><i>i,t</i></sub>              | -0.060**<br>(-2.55)   | -0.154**<br>(-2.02)                 | -0.138<br>(-1.29)    | -0.006<br>(-0.06)    | -0.009<br>(-0.22)    | 0.067<br>(1.35)      | -0.122*<br>(-1.88)   | -0.079<br>(-1.51)    | -0.120**<br>(-2.35)  | 0.020<br>(0.14)      | -0.106<br>(-1.20)    |
| <i>Total EAs</i> <sub><i>t</i></sub>                 | -0.010*<br>(-1.69)    | 0.012<br>(0.59)                     | -0.018<br>(-0.89)    | 0.004<br>(0.17)      | 0.010<br>(0.56)      | -0.030*<br>(-1.97)   | -0.005<br>(-0.29)    | -0.033*<br>(-1.90)   | -0.042**<br>(-2.41)  | 0.023<br>(1.08)      | -0.023<br>(-1.40)    |
| <i>Analyst Following</i> <sub><i>i,t</i></sub>       | -0.034<br>(-1.16)     | -0.087<br>(-1.33)                   | -0.139*<br>(-1.90)   | 0.063<br>(0.85)      | -0.062<br>(-0.63)    | 0.018<br>(0.23)      | 0.037<br>(0.57)      | -0.001<br>(-0.03)    | 0.058<br>(0.86)      | 0.074<br>(0.97)      | -0.201*<br>(-2.00)   |
| <i>Institutional Ownership</i> <sub><i>i,q</i></sub> | 0.636***<br>(6.59)    | 0.869***<br>(3.05)                  | 0.795**<br>(2.68)    | -0.139<br>(-0.70)    | 0.353<br>(1.28)      | 0.627***<br>(3.54)   | 0.075<br>(0.21)      | 0.770***<br>(2.96)   | 1.139***<br>(4.64)   | 0.748***<br>(4.11)   | 0.942***<br>(3.94)   |
| <i>BTM</i> <sub><i>i,q</i></sub>                     | -0.007*<br>(-1.77)    | -0.013<br>(-1.03)                   | 0.006<br>(0.35)      | -0.022**<br>(-2.02)  | -0.008<br>(-0.64)    | 0.017<br>(1.18)      | -0.005<br>(-0.43)    | 0.021<br>(1.59)      | -0.026**<br>(-2.65)  | -0.010<br>(-0.83)    | -0.020<br>(-1.49)    |
| Constant                                             | 0.622***<br>(5.23)    | 0.493<br>(1.58)                     | 0.746*<br>(1.72)     | 1.284***<br>(4.74)   | 0.938**<br>(2.21)    | 0.313<br>(1.27)      | 0.946**<br>(2.47)    | 0.537*<br>(1.68)     | 0.031<br>(0.08)      | -0.037<br>(-0.14)    | 0.992***<br>(3.52)   |
| Year-Week FE                                         | Included              | Included                            | Included             | Included             | Included             | Included             | Included             | Included             | Included             | Included             | Included             |
| Observations                                         | 245,015               | 24,549                              | 24,549               | 24,548               | 24,784               | 24,549               | 24,048               | 24,970               | 24,047               | 24,549               | 24,422               |
| Adjusted R-squared                                   | 0.008                 | 0.006                               | 0.007                | 0.007                | 0.006                | 0.004                | 0.007                | 0.009                | 0.011                | 0.007                | 0.006                |

*Panel C: TS-ASVI2*

|                                                      | <b>Pooled</b>        | <b>By Decile of TS-Noise Search</b> |                     |                     |                      |                     |                      |                     |                     |                     |                      |
|------------------------------------------------------|----------------------|-------------------------------------|---------------------|---------------------|----------------------|---------------------|----------------------|---------------------|---------------------|---------------------|----------------------|
|                                                      |                      | <b>1 [Low]</b>                      | <b>2</b>            | <b>3</b>            | <b>4</b>             | <b>5</b>            | <b>6</b>             | <b>7</b>            | <b>8</b>            | <b>9</b>            | <b>10 [High]</b>     |
| $\gamma_1$ for TS-ASVI2                              | 0.316***<br>(10.27)  | 0.307***<br>(3.16)                  | 0.263***<br>(2.76)  | 0.462***<br>(4.96)  | 0.254***<br>(3.12)   | 0.425***<br>(5.04)  | 0.499***<br>(5.24)   | 0.264***<br>(3.24)  | 0.398***<br>(3.82)  | 0.266**<br>(2.41)   | 0.216**<br>(2.29)    |
| <i>News Articles</i> <sub><i>i,t</i></sub>           | 0.020***<br>(10.08)  | 0.009*<br>(1.90)                    | 0.017**<br>(2.51)   | 0.015**<br>(2.43)   | 0.032***<br>(6.56)   | 0.016***<br>(3.44)  | 0.010<br>(1.60)      | 0.022***<br>(4.01)  | 0.013*<br>(1.81)    | 0.021***<br>(3.07)  | 0.021***<br>(4.45)   |
| <i>Abs Return</i> <sub><i>i,t</i></sub>              | 3.335***<br>(6.60)   | 1.802<br>(1.11)                     | 4.292***<br>(3.48)  | 7.833***<br>(5.04)  | 2.810**<br>(2.49)    | 3.172*<br>(1.77)    | 2.866**<br>(2.38)    | 3.524***<br>(3.21)  | 3.962***<br>(3.26)  | 1.795<br>(1.25)     | 1.743<br>(1.04)      |
| <i>MVE</i> <sub><i>i,q</i></sub>                     | 0.027***<br>(5.63)   | -0.000<br>(-0.02)                   | 0.010<br>(0.69)     | 0.055***<br>(3.31)  | 0.035***<br>(3.01)   | 0.051***<br>(4.91)  | 0.048***<br>(3.30)   | 0.017<br>(0.90)     | 0.024<br>(1.43)     | 0.008<br>(0.52)     | 0.015<br>(0.98)      |
| <i>Trading Volume</i> <sub><i>i,t</i></sub>          | 0.059***<br>(5.52)   | 0.058<br>(0.86)                     | 0.046*<br>(1.85)    | 0.048<br>(1.12)     | 0.052*<br>(1.83)     | 0.081***<br>(4.34)  | 0.072<br>(1.60)      | 0.051<br>(1.19)     | 0.050*<br>(1.80)    | 0.087**<br>(2.28)   | 0.042<br>(1.57)      |
| <i>Spread</i> <sub><i>i,t</i></sub>                  | 3.832***<br>(5.62)   | 3.691*<br>(1.94)                    | 3.453*<br>(1.98)    | 1.393<br>(0.73)     | 2.720*<br>(1.96)     | 5.646***<br>(2.78)  | 4.173**<br>(2.03)    | 3.563*<br>(1.80)    | 4.806**<br>(2.30)   | 2.055<br>(1.00)     | 5.475**<br>(2.60)    |
| <i>Fourth Qtr</i> <sub><i>i,t</i></sub>              | -0.005<br>(-0.42)    | 0.020<br>(0.69)                     | -0.087<br>(-1.31)   | 0.012<br>(0.304)    | -0.047<br>(-1.38)    | 0.019<br>(0.39)     | 0.026<br>(0.71)      | -0.022<br>(-0.49)   | -0.002<br>(-0.07)   | 0.014<br>(0.35)     | -0.052<br>(-1.39)    |
| <i>Total EAs</i> <sub><i>t</i></sub>                 | -0.004*<br>(-1.73)   | -0.003<br>(-0.45)                   | -0.002<br>(-0.32)   | -0.013<br>(-1.65)   | 0.000<br>(0.00)      | -0.007<br>(-1.37)   | 0.006<br>(0.91)      | -0.013*<br>(-1.83)  | -0.009<br>(-1.33)   | 0.006<br>(0.78)     | -0.002<br>(-0.29)    |
| <i>Analyst Following</i> <sub><i>i,t</i></sub>       | -0.014<br>(-0.57)    | -0.047<br>(-1.10)                   | -0.019<br>(-0.33)   | -0.207**<br>(-2.20) | 0.022<br>(0.44)      | -0.127*<br>(-1.90)  | 0.046<br>(0.61)      | 0.094<br>(0.95)     | 0.020<br>(0.27)     | -0.102<br>(-1.58)   | 0.139*<br>(2.00)     |
| <i>Institutional Ownership</i> <sub><i>i,q</i></sub> | -0.432***<br>(-5.11) | -0.717***<br>(-2.71)                | -0.295<br>(-1.51)   | -0.194<br>(-0.79)   | -0.204<br>(-1.33)    | -0.231<br>(-1.08)   | -0.325<br>(-0.79)    | -0.719**<br>(-2.26) | -0.885**<br>(-2.54) | -0.248<br>(-1.17)   | -0.595***<br>(-2.97) |
| <i>BTM</i> <sub><i>i,q</i></sub>                     | -0.006<br>(-1.48)    | -0.016<br>(-1.52)                   | -0.005<br>(-0.48)   | 0.015<br>(1.19)     | 0.001<br>(0.14)      | -0.028**<br>(-2.43) | 0.010<br>(0.71)      | -0.018<br>(-1.27)   | 0.002<br>(0.16)     | -0.001<br>(-0.14)   | -0.002<br>(-0.19)    |
| Constant                                             | -0.647***<br>(-5.71) | -0.156<br>(-0.59)                   | -0.619**<br>(-2.59) | -0.538<br>(-1.47)   | -1.008***<br>(-3.79) | -0.531*<br>(-1.91)  | -1.189***<br>(-2.91) | -0.492<br>(-1.35)   | -0.380<br>(-1.06)   | -0.553**<br>(-2.19) | -0.911***<br>(-3.71) |
| Year-Week FE                                         | Included             | Included                            | Included            | Included            | Included             | Included            | Included             | Included            | Included            | Included            | Included             |
| Observations                                         | 245,015              | 24,549                              | 24,549              | 24,548              | 24,784               | 24,549              | 24,048               | 24,970              | 24,047              | 24,549              | 24,422               |
| Adjusted R-squared                                   | 0.019                | 0.012                               | 0.016               | 0.024               | 0.024                | 0.030               | 0.025                | 0.028               | 0.024               | 0.017               | 0.021                |

## **SM6 - Published Papers Using Google SVI as a Measure of Attention (through mid-2022)**

| Year | Author(s)                                                    | Title                                                                                                                                         | Journal                                           |
|------|--------------------------------------------------------------|-----------------------------------------------------------------------------------------------------------------------------------------------|---------------------------------------------------|
| 2011 | Da, Engelberg, and Gao                                       | In search of attention                                                                                                                        | <i>Journal of Finance</i>                         |
| 2011 | Bank, Larch, and Peter                                       | Google search volume and its influence on liquidity and returns of German stocks                                                              | <i>Financial Markets and Portfolio Management</i> |
| 2011 | Joseph, Wintoki, and Zhang                                   | Forecasting abnormal stock returns and trading volume using investor sentiment: Evidence from online search                                   | <i>International Journal of Forecasting</i>       |
| 2012 | Drake, Roulstone, and Thornock                               | Investor information demand: Evidence from Google searches around earnings announcements                                                      | <i>Journal of Accounting Research</i>             |
| 2012 | Bordino, Battiston, Caldarelli, Cristelli, Ukkonen and Weber | Web Search Queries can predict stock market volumes                                                                                           | <i>PLoS ONE</i>                                   |
| 2012 | Choi and Varian                                              | Predicting the present with Google Trends.                                                                                                    | <i>Economic Record 88</i>                         |
| 2012 | Vlastakis and Markellos                                      | Information demand and stock market volatility                                                                                                | <i>Journal of Banking &amp; Finance</i>           |
| 2013 | Aouadi, Arouri, and Teulon                                   | Investor attention and stock market activity: Evidence from France                                                                            | <i>Economic Modelling</i>                         |
| 2013 | Carrière-Swallow and Labbé                                   | Nowcasting with Google Trends in an emerging market                                                                                           | <i>Journal of Forecasting</i>                     |
| 2013 | Jiang and Li                                                 | Investor sentiment and IPO pricing during pre-market and aftermarket periods: Evidence from Hong Kong                                         | <i>Pacific-Basin Finance Journal</i>              |
| 2013 | Korkeamaki and Takalo                                        | Valuation of innovation and intellectual property: The case of the iPhone                                                                     | <i>European Management Review</i>                 |
| 2013 | Kristoufek                                                   | Can Google Trends search queries contribute to Risk Diversification                                                                           | <i>Nature</i>                                     |
| 2013 | Preis, Moat, and Stanley                                     | Quantifying Trading Behavior in Financial Markets Using Google Trends                                                                         | <i>Nature</i>                                     |
| 2013 | Luo, Zhang, and Duan                                         | Social media and firm equity value                                                                                                            | <i>Information Systems Research</i>               |
| 2013 | Siganos                                                      | Google attention and target price run ups                                                                                                     | <i>International Review of Financial Analysis</i> |
| 2013 | Xiong and Bharadwaj                                          | Asymmetric roles of advertising and marketing capability in financial returns to news: Turning bad into good and good into great              | <i>Journal of Marketing Research</i>              |
| 2013 | Xu and Zhang                                                 | Impact of Wikipedia on market information: Evidence on management disclosure and investor reaction                                            | <i>MIS Quarterly</i>                              |
| 2013 | Zhang, Shen, Zhang, and Xiong                                | Open-source information, investor attention, and asset pricing                                                                                | <i>Economic Modelling</i>                         |
| 2014 | Gwilym, Kita, Wang                                           | Speculate against speculative demand                                                                                                          | <i>International Review of Financial Analysis</i> |
| 2014 | Knittel and Stango                                           | Celebrity endorsements, firm value, and reputation risk: Evidence from the Tiger Woods scandal                                                | <i>Management Science</i>                         |
| 2014 | Liu, Ye and Li                                               | Impacts of interactions between news attention and investor attention on stock returns: Empirical investigation on financial shares in China. | <i>Journal of Management Sciences in China</i>    |
| 2014 | Takeda and Wakao                                             | Google search intensity and its relationship with returns and trading volume of Japanese stocks                                               | <i>Pacific-Basin Finance Journal</i>              |
| 2014 | Vaughan                                                      | Discovering business information from search engine query data                                                                                | <i>Online Information Review</i>                  |
| 2014 | Vozlyublennaia                                               | Investor attention, index performance, and return predictability                                                                              | <i>Journal of Banking &amp; Finance</i>           |
| 2014 | Zhang, An, Feng                                              | Can online searches be used to forecast stock market performance?                                                                             | <i>Journal of Financial Research</i>              |
| 2015 | Brown, Stice, and White                                      | Mobile Communication and Local Information Flow: Evidence from Distracted Driving Laws                                                        | <i>Journal of Accounting Research</i>             |
| 2015 | Cergol and Omladic                                           | What can Wikipedia and Google tell us about stock prices under different market regimes?                                                      | <i>Ars Mathematica Contemporanea</i>              |
| 2015 | deHaan, Shevlin, Thornock                                    | Market (In)Attention and the Strategic Scheduling and Timing of Earnings Announcements                                                        | <i>Journal of Accounting and Economics</i>        |

|      |                                            |                                                                                                                           |                                                                             |
|------|--------------------------------------------|---------------------------------------------------------------------------------------------------------------------------|-----------------------------------------------------------------------------|
| 2015 | Ding and Hou                               | Retail investor attention and stock liquidity                                                                             | <i>Journal of International Financial Markets, Institutions &amp; Money</i> |
| 2015 | Drake, Roulstone, and Thornock             | The Determinants and Consequences of Information Acquisition via EDGAR                                                    | <i>Contemporary Accounting Research</i>                                     |
| 2015 | Goddard, Kita and Wang                     | Investor attention and FX market volatility                                                                               | <i>Journal of International Financial Markets, Institutions &amp; Money</i> |
| 2015 | Hoopes, Reck, Slemrod                      | Taxpayer Search for Information: Implications for Rational Attention                                                      | <i>American Economic Journal: Economic Policy</i>                           |
| 2015 | Kristoufek                                 | Power-law correlations in finance-related Google searches, and their cross-correlations with volatility and traded volume | <i>Physica A: Statistical Mechanics and its Applications</i>                |
| 2015 | Li, Ma, Wang, Zhang                        | How does Google search affect trader positions and crude oil prices?                                                      | <i>Economic Modelling</i>                                                   |
| 2016 | Bijl, Kringhaug, Molnar, Sandvik           | Google Searches and Stock Returns                                                                                         | <i>International Review of Financial Analysis</i>                           |
| 2016 | Curtis, Richardson, and Schmardebeck       | Investor attention and the pricing of earnings news                                                                       | <i>Handbook of Sentiment Analysis in Finance</i>                            |
| 2017 | Drake, Jennings, Roulstone and Thornock    | The co-movement of Investor Attention                                                                                     | <i>Management Science</i>                                                   |
| 2016 | Fang, Huang, Karpoff                       | Short Selling and Earnings Management: A Controlled Experiment                                                            | <i>Journal of Finance</i>                                                   |
| 2017 | Ben-Rephael, Da, Israelsen                 | It Depends on Where You Search: Institutional Investor Attention and Underreaction to News                                | <i>Review of Financial Studies</i>                                          |
| 2017 | Boulland and Dessaint                      | Announcing the Announcement                                                                                               | <i>Journal of Banking &amp; Finance</i>                                     |
| 2017 | Chi and Shantikumar                        | Local Bias in Google Search and the Market Response around Earnings Announcements                                         | <i>The Accounting Review</i>                                                |
| 2017 | Colaco, De Cesari, and Hegde               | Retail Investor Attention and IPO Valuation                                                                               | <i>European Financial Management</i>                                        |
| 2017 | Kong, Lin, Liu                             | Does Information Acquisition Alleviate Market Anomalies? Categorization Bias in Stock Splits                              | <i>Review of Finance</i>                                                    |
| 2017 | Madsen                                     | Anticipated Earnings Announcements and the Customer–Supplier Anomaly                                                      | <i>Journal of Accounting Research</i>                                       |
| 2017 | Welagedara, Deb, and Singh                 | Investor attention, analyst recommendation revisions, and stock prices                                                    | <i>Pacific-Basin Finance Journal</i>                                        |
| 2018 | Chang and Kwon                             | Ambiguities in valuing information technology firms: Do internet searches T help?                                         | <i>Journal of Business Research</i>                                         |
| 2018 | Chronopoulos, Papadimitriou, and Vlastakis | Information demand and stock return predictability                                                                        | <i>Journal of International Money and Finance</i>                           |
| 2018 | Frank and Sanati                           | How does the stock market absorb shocks?                                                                                  | <i>Journal of Financial Economics</i>                                       |
| 2018 | Hasan, Kumas, Smith                        | Market ambiguity and individual investor information demand                                                               | <i>Journal of Contemporary Accounting &amp; Economics</i>                   |
| 2018 | Kupfer and Zorn                            | Valuable information in early sales proxies: The use of Google search ranks in portfolio optimization                     | <i>Journal of Forecasting</i>                                               |
| 2018 | Mbanga, Darrat, and Park                   | Investor sentiment and aggregate stock returns: the role of investor attention                                            | <i>Review of Quantitative Finance and Accounting</i>                        |
| 2018 | Pantzalis and Ucar                         | Allergy onset and local investor distraction                                                                              | <i>Journal of Banking &amp; Finance</i>                                     |
| 2018 | Reyes                                      | Limited attention and M&A announcements                                                                                   | <i>Journal of Empirical Finance</i>                                         |
| 2018 | Reyes                                      | Negativity Bias in Attention Allocation: Retail Investors' Reaction to Stock Returns                                      | <i>International Review of Finance</i>                                      |
| 2018 | Reyes and Waissbluth                       | Saddled with Attention: Overreaction to Bankruptcy filings                                                                | <i>Review of Quantitative Finance and Accounting</i>                        |
| 2018 | Wang, Choi, Siraj                          | Local investor attention and post-earnings announcement drift                                                             | <i>Review of Financial Studies</i>                                          |
| 2018 | Gargano and Rossi                          | Does It Pay to Pay Attention?                                                                                             | <i>Review of Financial Studies</i>                                          |

|      |                                       |                                                                                                                                           |                                                           |
|------|---------------------------------------|-------------------------------------------------------------------------------------------------------------------------------------------|-----------------------------------------------------------|
| 2018 | Pantzalis and Ucar                    | Allergy onset and local investor distraction                                                                                              | <i>Journal of Banking &amp; Finance</i>                   |
| 2019 | Chen and Lo                           | Online search activities and investor attention on financial markets                                                                      | <i>Asia Pacific Management Review</i>                     |
| 2019 | Swamy, Dharani and Takeda             | Investor Attention and Google Search Volume Index: Evidence from an Emerging Market using Quantile Regression Analysis.                   | <i>Research in International Business and Finance</i>     |
| 2019 | Heyman, Lescauwae, and Stieperaere    | Investor Attention and Short-term Return Reversals.                                                                                       | <i>Finance Research Letters</i>                           |
| 2019 | Lučivjanská, Molnár, and Villa        | Google searches and stock market activity: Evidence from Norway                                                                           | <i>Finance Research Letters</i>                           |
| 2019 | Huang, Huang, Lin                     | Attention allocation and return co-movement: Evidence from repeated natural experiments                                                   | <i>Journal of Financial Economics</i>                     |
| 2019 | Madsen and Niessner                   | Is Investor Attention for Sale? The Role of Advertising in Financial Markets                                                              | <i>Journal of Accounting Research</i>                     |
| 2020 | Blankespoor, deHaan, and Marinovic    | Disclosure Processing Costs, Investors' Information Choice, and Equity Market Outcomes: A Review                                          | <i>Journal of Accounting and Economics</i>                |
| 2020 | Cheng, Huang, Hu                      | Investor attention and stock price movement.                                                                                              | <i>Journal of Behavioral Finance</i>                      |
| 2020 | Subramaniam and Chakraborty           | Investor Attention and Cryptocurrency Returns: Evidence from Quantile Causality Approach.                                                 | <i>Journal of Behavioral Finance</i>                      |
| 2020 | Hu and Xiangfei                       | Does individual investors' online search activities reduce information asymmetry? Evidence from stock exchanges' comment letters in China | <i>Asia-Pacific Journal of Accounting &amp; Economics</i> |
| 2020 | Choi, Gao and Jiang                   | Attention to Global Warming                                                                                                               | <i>The Review of Financial Studies</i>                    |
| 2020 | Cziraki, Mondria, and Wu              | Asymmetric attention and stock returns.                                                                                                   | <i>Management Science</i>                                 |
| 2020 | Chen, Wang, and Wang                  | Corporate social responsibility and information flow                                                                                      | <i>Accounting &amp; Finance</i>                           |
| 2020 | Dang and Nguyen                       | Valuation Effect of Emotionality in Corporate Philanthropy                                                                                | <i>Journal of Business Ethics</i>                         |
| 2020 | Gavish, Qadan, and Yangil             | Net Buyers of Attention-Grabbing Stocks? Who Exactly Are They?                                                                            | <i>Journal of Behavioral Finance</i>                      |
| 2020 | Zambrana                              | Asset Management and Financial Conglomerates: Attention Through Stellar Funds                                                             | <i>Management Science</i>                                 |
| 2020 | Tao, Brooks, and Bell                 | Tomorrow's fish and chip paper? Slowly incorporated news and the cross-section of stock returns                                           | <i>The European Journal of Finance</i>                    |
| 2020 | Cookson and Niessner                  | Why Don't We Agree? Evidence from a Social Network of Investors                                                                           | <i>Journal of Finance</i>                                 |
| 2020 | Chiu, Lourie, Nekrasov, and Teoh      | Cater to Thy Client: Analyst Responsiveness to Institutional Investor Attention                                                           | <i>Management Science</i>                                 |
| 2020 | Focke, Ruenzi, and Ungeheuer          | Advertising, Attention, and Financial Markets                                                                                             | <i>Review of Financial Studies</i>                        |
| 2020 | Clifford, Fulkerson, Jame, and Jordan | Saliency and Mutual Fund Investor Demand for Idiosyncratic Volatility                                                                     | <i>Management Science</i>                                 |
| 2020 | Cookson and Niessner,                 | Why don't we agree? Evidence from a social network of investors                                                                           | <i>The Journal of Finance</i>                             |
| 2021 | Desagre and D'Hondt                   | Googlization and retail trading activity                                                                                                  | <i>Journal of Behavioral and Experimental Finance</i>     |
| 2021 | Chen, Wang and Wang                   | Corporate social responsibility and information flow                                                                                      | <i>Accounting and Finance</i>                             |
| 2021 | Liaukonytė and Žaldokas               | Background noise? TV advertising affects real-time investor behavior.                                                                     | <i>Management Science</i>                                 |
| 2021 | Chen, Schmidt and Wang                | Retail investor risk-seeking, attention and the January effect.                                                                           | <i>Journal of Behavioral and Experimental Finance</i>     |
| 2021 | Kupfer and Schmidt                    | In search of retail investors: the effect of retail investor attention on odd lot trades                                                  | <i>Journal of Empirical Finance</i>                       |
| 2021 | Liu and Krystiniak                    | Investor Attention and Merger Announcements                                                                                               | <i>Journal of Behavioral Finance</i>                      |
| 2021 | Behrendt and Prange                   | What are you searching for? On the equivalence of proxies for online investor attention.                                                  | <i>Financial Research Letters</i>                         |
| 2021 | Chen, Chen, Lai                       | Internet search, fund flows and fund performance                                                                                          | <i>Journal of Banking and Finance</i>                     |
| 2021 | Chai, Dai, Gharghori, Hong            | Internet search intensity and its relation with trading activity and stock returns                                                        | <i>International Review of Finance</i>                    |
| 2021 | Ozik, Sadka, Shen                     | Flattening the illiquidity curve: retail trading during the COVID-19 lockdown                                                             | <i>Journal of Financial and Quantitative Analysis</i>     |
| 2021 | Chen, Schmidt, Wang                   | Retail investor risk-seeking, attention, and the January effect                                                                           | <i>Journal of Behavioral and Experimental Finance</i>     |
| 2021 | Nekrasov, Teoh, Wu                    | Visuals and attention to earnings news on twitter                                                                                         | <i>Review of Accounting Studies</i>                       |

|      |                                             |                                                                                                               |                                                       |
|------|---------------------------------------------|---------------------------------------------------------------------------------------------------------------|-------------------------------------------------------|
| 2022 | Foederer and Schuetz                        | Data breach announcements and stock market reactions a matter of timing?                                      | <i>Management Science</i>                             |
| 2022 | Israeli, Kasznik, and Sridharan             | Unexpected distractions and investor attention to corporate announcements                                     | <i>Review of Accounting Studies</i>                   |
| 2022 | Ballinari, Audrino, and Sigrist             | When does attention matter? The effect of investor attention on stock market volatility around news releases. | <i>International Review of Financial Analysis</i>     |
| 2022 | Chen, Tang, Yao, Zhou                       | Investor Attention and Stock Returns                                                                          | <i>Journal of Financial and Quantitative Analysis</i> |
| 2022 | Wu, Tsai, Lu, Zhang                         | Google searches around analyst recommendation revision announcements: evidence from the Taiwan stock markets  | <i>International Review of Economics and Finance</i>  |
| 2022 | Ma, Marshall, Nguyen, Nguyen, Vasltonachoti | Climate events and return co-movement                                                                         | <i>Journal of Financial Markets</i>                   |
| 2022 | Ben-Rephael, Da, Eason, Israelsen           | Who Pays Attention to SEC Form 8-K?                                                                           | <i>The Accounting Review</i>                          |
| 2022 | Coles, Heath, Ringgenberg                   | On index investing                                                                                            | <i>Journal of Financial Economics</i>                 |
| 2022 | Hirshleifer, Sheng                          | Macro news and micro news: Complements or substitutes?                                                        | <i>Journal of Financial Economics</i>                 |
| 2022 | Saxena, Chakraborty                         | Does it pay to pay attention to attention? Evidence from an emerging market                                   | <i>Managerial Finance</i>                             |
| 2022 | Hafeez, Kabir, Wongchoti                    | Are retail investors really passive? Shareholder activism in the digital age                                  | <i>Journal of Business, Finance, and Accounting</i>   |
| 2022 | Barber, Huang, Odean, Schwarz               | Attention-Induced Trading and Returns: Evidence from Robinhood Users                                          | <i>Journal of Finance</i>                             |
